# Supplementary material
Source: publisher site journal article supplement (https://jhr.pensoft.net/article/83318/download/suppl/31/)
Supplement: Supplementary file 1

## Sheet: SMTP_Dusona
Supplementary File S1
Material from the collection of the Swedish Malaise trap project used for the study: Open access in a taxonomic sense: a morphological and molecular guide to Western Palaearctic Dusona (Hymenoptera, Ichneumonidae).
Authors: Noah Meier, Karin Urfer, Håkon Haraldseide, Hege Vårdal, Seraina Klopfstein
Genus	cf.	Species	Author	Determined by	Det. date	Notes	Males	Females	Total	Cat. No	Imported	Storage	Media	TrapID	EventID	StartDate	EndDate	Country	Province	County	Locality	Latitude	Longitude	Method	Habitat	Specimen ID
Dusona		subimpressa	(Förster, 1868)	N.Meier	2020		1		1	99	999	Station Linné	dry	39	1805	2005.vii.13	2005.vii.21	Sweden	Skåne	Simrishamns kommun	Stenshuvuds nationalpark, Krivarboden	55.6603	14.2755	Malaise trap	litter rich broad-leaved deciduous forest	20-071
Dusona		nidulator	(Fabricius, 1804)	N.Meier	2020		1		1	99	999	Station Linné	dry	38	1443	2005.v.24	2005.v.31	Sweden	Skåne	Tomelilla kommun	Drakamöllan	55.7618	14.1178	Malaise trap	common bent heath on sandy area	20-073
Dusona		prominula	(Förster, 1868)	N.Meier	2020			1	1	99	999	Station Linné	dry	22	1314	2005.vi.15	2005.vi.29	Sweden	Öland	Mörbylånga kommun	Gamla Skogsby (Kalkstad)	56.6167	16.5076	Malaise trap	meadow with shrub vegetation	20-095
Dusona		bicoloripes	(Ashmead, 1906)	S.Klopfstein	2020			1	1	99	999	Station Linné	dry	39	1801	2005.v.26	2005.vi.20	Sweden	Skåne	Simrishamns kommun	Stenshuvuds nationalpark, Krivarboden	55.6603	14.2755	Malaise trap	litter rich broad-leaved deciduous forest	20-096
Dusona		sobolicida	(Förster, 1868)	N.Meier	2020		1		1	99	999	Station Linné	dry	7	1593	2005.vii.17	2005.viii.16	Sweden	Uppland	Älvkarleby kommun	Båtfors	60.4607	17.3178	Malaise trap	Mixed pine forest with blue berry	20-103
Dusona		humilis	(Förster, 1868)	N.Meier	2020			1	1	99	999	Station Linné	dry	15	1659	2005.v.28	2005.vii.05	Sweden	Östergötland	Ödeshögs kommun	Omberg, Storpissan	58.3349	14.655	Malaise trap	old Norway spruce wood	20-104
Dusona	cf.	rubidatae	Horstmann, 2009	S.Klopfstein	2020	antennal carina inconspicuous	1		1	99	999	Station Linné	dry	28	1463	2004.ix.21	2005.iv.01	Sweden	Gotland	Gotlands kommun	Roleks	57.5368	18.3379	Malaise trap	border between mixed pine forest and open grazed calcareous pasture	20-105
Dusona		pulchripes	(Holmgren, 1872)	N.Meier	2020			1	1	99	999	Station Linné	dry	20	1496	2005.vi.03	2005.vi.26	Sweden	Öland	Mörbylånga kommun	Frösslunda alvar	56.5474	16.5772	Malaise trap	alvar pasture	20-106
Dusona		leptogaster	(Holmgren, 1860)	N.Meier	2020			1	1	99	999	Station Linné	dry	40	1811	2005.v.22	2005.vi.20	Sweden	Skåne	Simrishamns kommun	Stenshuvuds nationalpark, Svabeholmsskog	55.6614	14.2687	Malaise trap	hornbeam forest	20-107
Dusona		circumspectans	(Förster, 1868)	N.Meier	2020		1		1	99	999	Station Linné	dry	22	840	2005.iv.25	2005.v.20	Sweden	Öland	Mörbylånga kommun	Gamla Skogsby (Kalkstad)	56.6167	16.5076	Malaise trap	meadow with shrub vegetation	20-108
Dusona		inermis	(Förster, 1868)	N.Meier	2020			1	1	99	999	Station Linné	dry	29	1397	2005.viii.15	2005.viii.26	Sweden	Gotland	Gotlands kommun	Rembs	56.9334	18.2688	Malaise trap	lichen-rich pine forest on sand dunes	20-109
Dusona		tenuis	(Förster, 1868)	N.Meier	2020		1		1	99	999	Station Linné	dry	28	1466	2005.vii.05	2005.vii.17	Sweden	Gotland	Gotlands kommun	Roleks	57.5368	18.3379	Malaise trap	border between mixed pine forest and open grazed calcareous pasture	20-111
Dusona		bicoloripes	(Ashmead, 1906)	N.Meier	2020			1	1	99	999	Station Linné	dry	8	1601	2005.v.20	2005.vi.20	Sweden	Uppland	Håbo kommun	Biskops-Arnö	59.6721	17.5008	Malaise trap	Elm grove	20-112
Dusona		insignita	(Förster, 1868)	N.Meier	2020			1	1	99	999	Station Linné	dry	22	1313	2005.vi.01	2005.vi.15	Sweden	Öland	Mörbylånga kommun	Gamla Skogsby (Kalkstad)	56.6167	16.5076	Malaise trap	meadow with shrub vegetation	20-113
Dusona		flagellator	(J.C.Fabricius, 1793)	N.Meier	2020		1		1	99	999	Station Linné	dry	22	1315	2005.vi.29	2005.vii.18	Sweden	Öland	Mörbylånga kommun	Gamla Skogsby (Kalkstad)	56.6167	16.5076	Malaise trap	meadow with shrub vegetation	20-115
Dusona		circumcinctus	(Förster, 1868)	N.Meier	2020			1	1	99	999	Station Linné	dry	22	1363	2005.viii.01	2005.viii.19	Sweden	Öland	Mörbylånga kommun	Gamla Skogsby (Kalkstad)	56.6167	16.5076	Malaise trap	meadow with shrub vegetation	20-116
Dusona		xenocampta	(Förster, 1868)	N.Meier	2020		1		1	99	999	Station Linné	dry	28	1465	2005.vi.06	2005.vii.05	Sweden	Gotland	Gotlands kommun	Roleks	57.5368	18.3379	Malaise trap	border between mixed pine forest and open grazed calcareous pasture	20-118
Dusona		notabilis	(Förster, 1868)	N.Meier	2020		1		1	99	999	Station Linné	dry	43	1907	2005.vi.15	2005.vi.29	Sweden	Hälsingland	Hudiksvalls kommun	Stensjön-Lomtjärn	62.1403	16.2861	Malaise trap	marsh pine wood close to bog	20-119
Dusona		terebrator	(Förster, 1868)	N.Meier	2020			1	1	99	999	Station Linné	dry	32	1530	2005-vi.30	2005.vii.16	Sweden	Bohuslän	Tanums kommun	Hamburgsund, Stora Snixholmen	58.5644	11.2517	Malaise trap	semi-exposed coastal flat-rock	20-120
Dusona		admontina	(Speiser, 1908)	N.Meier	2020		1		1	99	999	Station Linné	dry	40	1810	2005.iv.22	2005.v.22	Sweden	Skåne	Simrishamns kommun	Stenshuvuds nationalpark, Svabeholmsskog	55.6614	14.2687	Malaise trap	hornbeam forest	20-121
Dusona		angustifrons	(Förster, 1868)	N.Meier	2020			1	1	99	999	Station Linné	dry	1002	1378	2005.vii.23	2005.viii.12	Sweden	Värmland	Munkfors kommun	Ransäter, Rudstorp	59.773	13.4737	Malaise trap	Sandy railway embankment through pasture-land	20-122
Dusona		annexa	(Förster, 1868)	N.Meier	2020		1		1	99	999	Station Linné	dry	43	1907	2005.vi.15	2005.vi.29	Sweden	Hälsingland	Hudiksvalls kommun	Stensjön-Lomtjärn	62.1403	16.2861	Malaise trap	marsh pine wood close to bog	20-123
Dusona		alpina	(Strobl, 1904)	N.Meier	2020			1	1	99	999	Station Linné	dry	1002	1378	2005.vii.23	2005.viii.12	Sweden	Värmland	Munkfors kommun	Ransäter, Rudstorp	59.773	13.4737	Malaise trap	Sandy railway embankment through pasture-land	20-124
Dusona		alticola	(Gravenhorst, 1829)	N.Meier	2020			1	1	99	999	Station Linné	dry	1002	1379	2005.viii.12	2005.viii.24	Sweden	Värmland	Munkfors kommun	Ransäter, Rudstorp	59.773	13.4737	Malaise trap	Sandy railway embankment through pasture-land	20-125
Dusona		bellipes	(Holmgren, 1872)	N.Meier	2020			1	1	99	999	Station Linné	dry	2003	2033	2006.vi.09	2006.vi.29	Sweden	Södermanland	Huddinge kommun	Sofielunds återvinningsanläggning, kadaverdeponi	59.1765	17.9938	Malaise trap	garbage dump – cadaver landfill	20-126
Dusona		confusa	(Förster, 1868)	N.Meier	2020			1	1	99	999	Station Linné	dry	42	1167	2004.viii.04	2005.iv.20	Sweden	Härjedalen	Härejdalens kommun	Sånfjället, Nyvallens fäbod	62.3167	13.5686	Malaise trap	alpine birch and spruce wood	20-127
Dusona		infesta	(Förster, 1868)	N.Meier	2020		1		1	99	999	Station Linné	dry	1008	1740	2006.vi.28	2006.vii.04	Sweden	Småland	Nybro kommun	Alsterbro/Alsterån	56.9365	15.9202	Malaise trap	Mixed forest	20-128
Dusona		pugillator	(Linnaeus, 1758)	N.Meier	2020			1	1	99	999	Station Linné	dry	31	1548	2005.viii.01	2005.viii.16	Sweden	Bohuslän	Stenungsunds kommun	Kolhättan	58.1409	11.8562	Malaise trap	broad-leaved deciduous forest	20-129
Dusona		minor	(Provancher, 1879)	N.Meier	2020			1	1	99	999	Station Linné	dry	50	1223	2004.vii.08	2004.viii.05	Sweden	Torne lappmark	Kiruna kommun	Abisko nationalpark, fjällbjörkskog	68.3539	18.7822	Malaise trap	dry mountain birch forest	20-130
Dusona		baueri	Hinz, 1973	N.Meier	2020		1		1	99	999	Station Linné	dry	22	840	2005.iv.25	2005.v.20	Sweden	Öland	Mörbylånga kommun	Gamla Skogsby (Kalkstad)	56.6167	16.5076	Malaise trap	meadow with shrub vegetation	20-133
Dusona		bucculenta	(Holmgren, 1860)	N.Meier	2020		1		1	99	999	Station Linné	dry	2006	2016	2007.vii.13	2007.vii.24	Sweden	Öland	Mörbylånga kommun	Ekologiska forskningsstationen, Skogsby	56.619	16.4973	Malaise trap	Lawn 100 m North of the Alvar edge	20-134
Dusona		carinifrons	(Holmgren, 1860)	N.Meier	2020			1	1	99	999	Station Linné	dry	1005	1419	2005.v.22	2005.vii.15	Sweden	Skåne	Ystad kommun	Sandhammaren, Järahusen	55.3981	14.2094	Malaise trap	Border between forest and sandhill dunes	20-135
Dusona		limnobia	(Thomson, 1887)	N.Meier	2020			1	1	99	999	Station Linné	dry	2046	2055	2008.vii.16	2008.viii.01	Sweden	Småland	Torsås Kommun	Söderåkra, Påboda	56.4347	16.0708	Malaise trap	Garden	20-137
Dusona		prominula	(Förster, 1868)	N.Meier	2020			1	1	99	999	Station Linné	dry	39	1802	2005.vi.20	2005.vi.26	Sweden	Skåne	Simrishamns kommun	Stenshuvuds nationalpark, Krivarboden	55.6603	14.2755	Malaise trap	litter rich broad-leaved deciduous forest	20-138
Dusona		confusa	(Förster, 1868)	N.Meier	2020			1	1	99	999	Station Linné	dry	1001	1728	2006.v.18	2006.vi.15	Sweden	Småland	Nybro kommun	Bäckebo, Grytsjöns naturreservat, Äng	56.9314	16.0855	Malaise trap	Old moisty haymaking meadow at edge of mixed forest	20-140
Dusona		spinipes	(Thomson, 1887)	N.Meier	2020			1	1	99	999	Station Linné	dry	1008	1742	2006.vii.10	2006.vii.16	Sweden	Småland	Nybro kommun	Alsterbro/Alsterån	56.9365	15.9202	Malaise trap	Mixed forest	20-141
Dusona	cf.	carpathica	(Szépligeti, 1916)	N.Meier	2020	hind leg more red than usual in carpathica		1	1	99	999	Station Linné	dry	7	1593	2005.vii.17	2005.viii.16	Sweden	Uppland	Älvkarleby kommun	Båtfors	60.4607	17.3178	Malaise trap	Mixed pine forest with blue berry	20-142
Dusona		obliterata	(Holmgren, 1872)	N.Meier	2020		1		1	99	999	Station Linné	dry	7	1592	2005.vii.04	2005.vii.17	Sweden	Uppland	Älvkarleby kommun	Båtfors	60.4607	17.3178	Malaise trap	Mixed pine forest with blue berry	20-158
Dusona		blanda	(Förster, 1868)	N.Meier	2020			1	1	99	999	Station Linné	dry	1001	1335	2005.vii.25	2005.viii.02	Sweden	Småland	Nybro kommun	Bäckebo, Grytsjöns naturreservat, Äng	56.9314	16.0855	Malaise trap	Old moisty haymaking meadow at edge of mixed forest	20-181
Dusona		tenuis	(Förster, 1868)	N.Meier	2020		1		1	99	999	Station Linné	dry	2046	2054	2008.vii.01	2008.vii.16	Sweden	Småland	Torsås Kommun	Söderåkra, Påboda	56.4347	16.0708	Malaise trap	Garden	20-182
Dusona		admontina	(Speiser, 1908)	N.Meier	2020		1		1	99	999	Station Linné	dry	1008	1742	2006.vii.10	2006.vii.16	Sweden	Småland	Nybro kommun	Alsterbro/Alsterån	56.9365	15.9202	Malaise trap	Mixed forest	20-183
Dusona		prominula	(Förster, 1868)	N.Meier	2020			1	1	99	999	Station Linné	dry	22	1313	2005.vi.01	2005.vi.15	Sweden	Öland	Mörbylånga kommun	Gamla Skogsby (Kalkstad)	56.6167	16.5076	Malaise trap	meadow with shrub vegetation	20-184
Dusona		notabilis	(Förster, 1868)	N.Meier	2020			1	1	99	999	Station Linné	dry	43	1907	2005.vi.15	2005.vi.29	Sweden	Hälsingland	Hudiksvalls kommun	Stensjön-Lomtjärn	62.1403	16.2861	Malaise trap	marsh pine wood close to bog	20-185
Dusona	cf.	bicoloripes	(Ashmead, 1906)	N.Meier	2020	bicoloripes based on seq, hind tibia unusually yellow		1	1	99	999	Station Linné	dry	40	1811	2005.v.22	2005.vi.20	Sweden	Skåne	Simrishamns kommun	Stenshuvuds nationalpark, Svabeholmsskog	55.6614	14.2687	Malaise trap	hornbeam forest	20-197
Dusona	cf.	nebulosa	Horstmann, 2004	N.Meier	2020		1		1	99	999	Station Linné	dry	6	372	2003.viii.26	2003.ix.09	Sweden	Uppland	Älvkarleby kommun	Marma skjutfält	60.5243	17.4515	Malaise trap	Dry meadow with birch (field of fire)	20-198
Dusona		notabilis	(Förster, 1868)	N.Meier	2020			1	1	99	999	Station Linné	dry	43	1907	2005.vi.15	2005.vi.29	Sweden	Hälsingland	Hudiksvalls kommun	Stensjön-Lomtjärn	62.1403	16.2861	Malaise trap	marsh pine wood close to bog	20-199
Dusona		bicoloripes	(Ashmead, 1906)	N.Meier	2020			1	1	99	999	Station Linné	dry	3002	3051	2014.v.15	2014.vi.09	Sweden	Öland	Mörbylånga kommun	Västerstads almlund nature reserve	56.4273	16.4219	Malaise trap	almlund	20-200
Dusona		circumspectans	(Förster, 1868)	N.Meier	2020		1		1	99	999	Station Linné	dry	13	1640	2005.iv.28	2005.v.28	Sweden	Östergötland	Ödeshögs kommun	Omberg, Stocklycke äng	58.3075	14.631	Malaise trap	lime meadow	20-201
Dusona		bicoloripes	(Ashmead, 1906)	N.Meier	2020			1	1	99	999	Station Linné	dry	3001	3050	2014.v.15	2014.vi.09	Sweden	Öland	Mörbylånga kommun	Västerstads almlund nature reserve	56.4276	16.4211	Malaise trap	almlund	20-211
Dusona		rubidatae	Horstmann, 2009	N.Meier	2020			1	1	99	999	Station Linné	dry	22	1316	2005.vii.18	2005.viii.01	Sweden	Öland	Mörbylånga kommun	Gamla Skogsby (Kalkstad)	56.6167	16.5076	Malaise trap	meadow with shrub vegetation	20-254
Dusona		bicoloripes	(Ashmead, 1906)	N.Meier	2020			1	1	99	999	Station Linné	dry	8	1601	2005.v.20	2005.vi.20	Sweden	Uppland	Håbo kommun	Biskops-Arnö	59.6721	17.5008	Malaise trap	Elm grove	20-351
Dusona		admontina	(Speiser, 1908)	N.Meier	2020			1	1	99	999	Station Linné	dry	3	799	2004.vii.20	2004.viii.11	Sweden	Södermanland	Haninge kommun	Tyresta, Urskogsslingan	59.1768	18.2469	Malaise trap	Tall, flat-rock pine forest
Dusona		admontina	(Speiser, 1908)	N.Meier	2020		1		1	99	999	Station Linné	dry	39	1799	2005.ii.17	2005.iv.22	Sweden	Skåne	Simrishamns kommun	Stenshuvuds nationalpark, Krivarboden	55.6603	14.2755	Malaise trap	litter rich broad-leaved deciduous forest
Dusona		admontina	(Speiser, 1908)	N.Meier	2020		1		1	99	999	Station Linné	dry	40	1814	2005.vii.05	2005.vii.13	Sweden	Skåne	Simrishamns kommun	Stenshuvuds nationalpark, Svabeholmsskog	55.6614	14.2687	Malaise trap	hornbeam forest
Dusona		alpina	(Strobl, 1904)	N.Meier	2020		1		1	99	999	Station Linné	dry	28	1463	2004.ix.21	2005.iv.01	Sweden	Gotland	Gotlands kommun	Roleks	57.5368	18.3379	Malaise trap	border between mixed pine forest and open grazed calcareous pasture
Dusona		angustifrons	(Förster, 1868)	N.Meier	2020			1	1	99	999	Station Linné	dry	3	799	2004.vii.20	2004.viii.11	Sweden	Södermanland	Haninge kommun	Tyresta, Urskogsslingan	59.1768	18.2469	Malaise trap	Tall, flat-rock pine forest
Dusona		angustifrons	(Förster, 1868)	N.Meier	2020			1	1	99	999	Station Linné	dry	7	1593	2005.vii.17	2005.viii.16	Sweden	Uppland	Älvkarleby kommun	Båtfors	60.4607	17.3178	Malaise trap	Mixed pine forest with blue berry
Dusona		angustifrons	(Förster, 1868)	N.Meier	2020		1		1	99	999	Station Linné	dry	32	1533	2005.viii.18	2005.viii.30	Sweden	Bohuslän	Tanums kommun	Hamburgsund, Stora Snixholmen	58.5644	11.2517	Malaise trap	semi-exposed coastal flat-rock
Dusona		angustifrons	(Förster, 1868)	N.Meier	2020			1	1	99	999	Station Linné	dry	43	1908	2005.vi.29	2005.vii.14	Sweden	Hälsingland	Hudiksvalls kommun	Stensjön-Lomtjärn	62.1403	16.2861	Malaise trap	marsh pine wood close to bog
Dusona		angustifrons	(Förster, 1868)	N.Meier	2020		1		1	99	999	Station Linné	dry	47	1956	2005.vii.15	2005.viii.16	Sweden	Lule lappmark	Jokkmokks kommun	Muddus nationalpark	66.7695	20.1114	Malaise trap	blueberry spruce forest
Dusona		annexa	(Förster, 1868)	N.Meier	2020			1	1	99	999	Station Linné	dry	1002	1374	2005.vi.25	2005.vii.07	Sweden	Värmland	Munkfors kommun	Ransäter, Rudstorp	59.773	13.4737	Malaise trap	Sandy railway embankment through pasture-land
Dusona		baueri	Hinz, 1973	S.Klopfstein	2021		1		1	99	999	Station Linné	dry	22	1725	2006.v.20	2006.vi.28	Sweden	Öland	Mörbylånga kommun	Gamla Skogsby (Kalkstad)	56.6167	16.5076	Malaise trap	meadow with shrub vegetation
Dusona		bicoloripes	(Ashmead, 1906)	S.Klopfstein	2021			1	1	99	999	Station Linné	dry	7	1591	2005.vi.14	2005.vii.04	Sweden	Uppland	Älvkarleby kommun	Båtfors	60.4607	17.3178	Malaise trap	Mixed pine forest with blue berry
Dusona		bicoloripes	(Ashmead, 1906)	S.Klopfstein	2021			1	1	99	999	Station Linné	dry	7	1591	2005.vi.14	2005.vii.04	Sweden	Uppland	Älvkarleby kommun	Båtfors	60.4607	17.3178	Malaise trap	Mixed pine forest with blue berry
Dusona		bicoloripes	(Ashmead, 1906)	S.Klopfstein	2021			1	1	99	999	Station Linné	dry	7	378	2003.vi.17	2003.vii.03	Sweden	Uppland	Älvkarleby kommun	Båtfors	60.4607	17.3178	Malaise trap	Mixed pine forest with blue berry
Dusona		bicoloripes	(Ashmead, 1906)	S.Klopfstein	2021			1	1	99	999	Station Linné	dry	7	378	2003.vi.17	2003.vii.03	Sweden	Uppland	Älvkarleby kommun	Båtfors	60.4607	17.3178	Malaise trap	Mixed pine forest with blue berry
Dusona		bicoloripes	(Ashmead, 1906)	S.Klopfstein	2021			1	1	99	999	Station Linné	dry	7	858	2004.vi.27	2004.vii.01	Sweden	Uppland	Älvkarleby kommun	Båtfors	60.4607	17.3178	Malaise trap	Mixed pine forest with blue berry
Dusona		bicoloripes	(Ashmead, 1906)	N.Meier	2020			1	1	99	999	Station Linné	dry	8	1601	2005.v.20	2005.vi.20	Sweden	Uppland	Håbo kommun	Biskops-Arnö	59.6721	17.5008	Malaise trap	Elm grove
Dusona		bicoloripes	(Ashmead, 1906)	N.Meier	2020			1	1	99	999	Station Linné	dry	8	1601	2005.v.20	2005.vi.20	Sweden	Uppland	Håbo kommun	Biskops-Arnö	59.6721	17.5008	Malaise trap	Elm grove
Dusona		bicoloripes	(Ashmead, 1906)	N.Meier	2020			1	1	99	999	Station Linné	dry	8	1601	2005.v.20	2005.vi.20	Sweden	Uppland	Håbo kommun	Biskops-Arnö	59.6721	17.5008	Malaise trap	Elm grove
Dusona		bicoloripes	(Ashmead, 1906)	N.Meier	2020			1	1	99	999	Station Linné	dry	8	1601	2005.v.20	2005.vi.20	Sweden	Uppland	Håbo kommun	Biskops-Arnö	59.6721	17.5008	Malaise trap	Elm grove
Dusona		bicoloripes	(Ashmead, 1906)	N.Meier	2020			1	1	99	999	Station Linné	dry	9	1610	2005.vi.24	2005.vii.16	Sweden	Uppland	Knivsta kommun	Rickebasta alsumpskog	59.7343	17.7204	Malaise trap	Alder swamp wood
Dusona		bicoloripes	(Ashmead, 1906)	N.Meier	2020			1	1	99	999	Station Linné	dry	13	1641	2005.v.28	2005.vi.15	Sweden	Östergötland	Ödeshögs kommun	Omberg, Stocklycke äng	58.3075	14.631	Malaise trap	lime meadow
Dusona		bicoloripes	(Ashmead, 1906)	N.Meier	2020			1	1	99	999	Station Linné	dry	21	1506	2005.vi.22	2005.vii.01	Sweden	Öland	Mörbylånga kommun	Södra lunden (Ottenby),	56.2193	16.4224	Malaise trap	nemoral grove
Dusona		bicoloripes	(Ashmead, 1906)	N.Meier	2020			1	1	99	999	Station Linné	dry	22	1314	2005.vi.15	2005.vi.29	Sweden	Öland	Mörbylånga kommun	Gamla Skogsby (Kalkstad)	56.6167	16.5076	Malaise trap	meadow with shrub vegetation
Dusona		bicoloripes	(Ashmead, 1906)	N.Meier	2020			1	1	99	999	Station Linné	dry	22	1314	2005.vi.15	2005.vi.29	Sweden	Öland	Mörbylånga kommun	Gamla Skogsby (Kalkstad)	56.6167	16.5076	Malaise trap	meadow with shrub vegetation
Dusona		bicoloripes	(Ashmead, 1906)	N.Meier	2020			1	1	99	999	Station Linné	dry	22	1314	2005.vi.15	2005.vi.29	Sweden	Öland	Mörbylånga kommun	Gamla Skogsby (Kalkstad)	56.6167	16.5076	Malaise trap	meadow with shrub vegetation
Dusona		bicoloripes	(Ashmead, 1906)	N.Meier	2020			1	1	99	999	Station Linné	dry	22	1314	2005.vi.15	2005.vi.29	Sweden	Öland	Mörbylånga kommun	Gamla Skogsby (Kalkstad)	56.6167	16.5076	Malaise trap	meadow with shrub vegetation
Dusona		bicoloripes	(Ashmead, 1906)	N.Meier	2020			1	1	99	999	Station Linné	dry	22	1314	2005.vi.15	2005.vi.29	Sweden	Öland	Mörbylånga kommun	Gamla Skogsby (Kalkstad)	56.6167	16.5076	Malaise trap	meadow with shrub vegetation
Dusona		bicoloripes	(Ashmead, 1906)	N.Meier	2020			1	1	99	999	Station Linné	dry	22	1314	2005.vi.15	2005.vi.29	Sweden	Öland	Mörbylånga kommun	Gamla Skogsby (Kalkstad)	56.6167	16.5076	Malaise trap	meadow with shrub vegetation
Dusona		bicoloripes	(Ashmead, 1906)	N.Meier	2020			1	1	99	999	Station Linné	dry	30	1716	2004.x.28	2005.vi.16	Sweden	Södermanland	Södertälje kommun	Tullgarns näs, Rävsalaviken	58.9552	17.6075	Malaise trap	mixed forest next to pasture
Dusona		bicoloripes	(Ashmead, 1906)	N.Meier	2020			1	1	99	999	Station Linné	dry	31	1545	2005.v.26	2005.vi.23	Sweden	Bohuslän	Stenungsunds kommun	Kolhättan	58.1409	11.8562	Malaise trap	broad-leaved deciduous forest
Dusona		bicoloripes	(Ashmead, 1906)	N.Meier	2020			1	1	99	999	Station Linné	dry	31	1545	2005.v.26	2005.vi.23	Sweden	Bohuslän	Stenungsunds kommun	Kolhättan	58.1409	11.8562	Malaise trap	broad-leaved deciduous forest
Dusona		bicoloripes	(Ashmead, 1906)	N.Meier	2020			1	1	99	999	Station Linné	dry	31	1546	2005.vi.23	2005.vii.15	Sweden	Bohuslän	Stenungsunds kommun	Kolhättan	58.1409	11.8562	Malaise trap	broad-leaved deciduous forest
Dusona		bicoloripes	(Ashmead, 1906)	N.Meier	2020			1	1	99	999	Station Linné	dry	31	1545	2005.v.26	2005.vi.23	Sweden	Bohuslän	Stenungsunds kommun	Kolhättan	58.1409	11.8562	Malaise trap	broad-leaved deciduous forest
Dusona		bicoloripes	(Ashmead, 1906)	N.Meier	2020			1	1	99	999	Station Linné	dry	38	1446	2005.vi.13	2005.vi.20	Sweden	Skåne	Tomelilla kommun	Drakamöllan	55.7618	14.1178	Malaise trap	common bent heath on sandy area
Dusona		bicoloripes	(Ashmead, 1906)	N.Meier	2020			1	1	99	999	Station Linné	dry	38	1446	2005.vi.13	2005.vi.20	Sweden	Skåne	Tomelilla kommun	Drakamöllan	55.7618	14.1178	Malaise trap	common bent heath on sandy area
Dusona		bicoloripes	(Ashmead, 1906)	N.Meier	2020			1	1	99	999	Station Linné	dry	38	1446	2005.vi.13	2005.vi.20	Sweden	Skåne	Tomelilla kommun	Drakamöllan	55.7618	14.1178	Malaise trap	common bent heath on sandy area
Dusona		bicoloripes	(Ashmead, 1906)	N.Meier	2020			1	1	99	999	Station Linné	dry	39	1801	2005.v.26	2005.vi.20	Sweden	Skåne	Simrishamns kommun	Stenshuvuds nationalpark, Krivarboden	55.6603	14.2755	Malaise trap	litter rich broad-leaved deciduous forest
Dusona		bicoloripes	(Ashmead, 1906)	N.Meier	2020			1	1	99	999	Station Linné	dry	39	1801	2005.v.26	2005.vi.20	Sweden	Skåne	Simrishamns kommun	Stenshuvuds nationalpark, Krivarboden	55.6603	14.2755	Malaise trap	litter rich broad-leaved deciduous forest
Dusona		bicoloripes	(Ashmead, 1906)	N.Meier	2020			1	1	99	999	Station Linné	dry	39	1801	2005.v.26	2005.vi.20	Sweden	Skåne	Simrishamns kommun	Stenshuvuds nationalpark, Krivarboden	55.6603	14.2755	Malaise trap	litter rich broad-leaved deciduous forest
Dusona		bicoloripes	(Ashmead, 1906)	N.Meier	2020			1	1	99	999	Station Linné	dry	39	1801	2005.v.26	2005.vi.20	Sweden	Skåne	Simrishamns kommun	Stenshuvuds nationalpark, Krivarboden	55.6603	14.2755	Malaise trap	litter rich broad-leaved deciduous forest
Dusona		bicoloripes	(Ashmead, 1906)	N.Meier	2020			1	1	99	999	Station Linné	dry	39	1801	2005.v.26	2005.vi.20	Sweden	Skåne	Simrishamns kommun	Stenshuvuds nationalpark, Krivarboden	55.6603	14.2755	Malaise trap	litter rich broad-leaved deciduous forest
Dusona		bicoloripes	(Ashmead, 1906)	N.Meier	2020			1	1	99	999	Station Linné	dry	39	1801	2005.v.26	2005.vi.20	Sweden	Skåne	Simrishamns kommun	Stenshuvuds nationalpark, Krivarboden	55.6603	14.2755	Malaise trap	litter rich broad-leaved deciduous forest
Dusona		bicoloripes	(Ashmead, 1906)	N.Meier	2020			1	1	99	999	Station Linné	dry	39	1802	2005.vi.20	2005.vi.26	Sweden	Skåne	Simrishamns kommun	Stenshuvuds nationalpark, Krivarboden	55.6603	14.2755	Malaise trap	litter rich broad-leaved deciduous forest
Dusona		bicoloripes	(Ashmead, 1906)	N.Meier	2020			1	1	99	999	Station Linné	dry	39	1801	2005.v.26	2005.vi.20	Sweden	Skåne	Simrishamns kommun	Stenshuvuds nationalpark, Krivarboden	55.6603	14.2755	Malaise trap	litter rich broad-leaved deciduous forest
Dusona		bicoloripes	(Ashmead, 1906)	N.Meier	2020			1	1	99	999	Station Linné	dry	39	1801	2005.v.26	2005.vi.20	Sweden	Skåne	Simrishamns kommun	Stenshuvuds nationalpark, Krivarboden	55.6603	14.2755	Malaise trap	litter rich broad-leaved deciduous forest
Dusona		bicoloripes	(Ashmead, 1906)	N.Meier	2020			1	1	99	999	Station Linné	dry	39	1801	2005.v.26	2005.vi.20	Sweden	Skåne	Simrishamns kommun	Stenshuvuds nationalpark, Krivarboden	55.6603	14.2755	Malaise trap	litter rich broad-leaved deciduous forest
Dusona		bicoloripes	(Ashmead, 1906)	N.Meier	2020			1	1	99	999	Station Linné	dry	39	1801	2005.v.26	2005.vi.20	Sweden	Skåne	Simrishamns kommun	Stenshuvuds nationalpark, Krivarboden	55.6603	14.2755	Malaise trap	litter rich broad-leaved deciduous forest
Dusona		bicoloripes	(Ashmead, 1906)	N.Meier	2020			1	1	99	999	Station Linné	dry	39	1801	2005.v.26	2005.vi.20	Sweden	Skåne	Simrishamns kommun	Stenshuvuds nationalpark, Krivarboden	55.6603	14.2755	Malaise trap	litter rich broad-leaved deciduous forest
Dusona		bicoloripes	(Ashmead, 1906)	N.Meier	2020			1	1	99	999	Station Linné	dry	39	1801	2005.v.26	2005.vi.20	Sweden	Skåne	Simrishamns kommun	Stenshuvuds nationalpark, Krivarboden	55.6603	14.2755	Malaise trap	litter rich broad-leaved deciduous forest
Dusona		bicoloripes	(Ashmead, 1906)	N.Meier	2020			1	1	99	999	Station Linné	dry	40	1812	2005.vi.20	2005.vi.26	Sweden	Skåne	Simrishamns kommun	Stenshuvuds nationalpark, Svabeholmsskog	55.6614	14.2687	Malaise trap	hornbeam forest
Dusona		bicoloripes	(Ashmead, 1906)	N.Meier	2020			1	1	99	999	Station Linné	dry	40	1811	2005.v.22	2005.vi.20	Sweden	Skåne	Simrishamns kommun	Stenshuvuds nationalpark, Svabeholmsskog	55.6614	14.2687	Malaise trap	hornbeam forest
Dusona		bicoloripes	(Ashmead, 1906)	N.Meier	2020			1	1	99	999	Station Linné	dry	40	1811	2005.v.22	2005.vi.20	Sweden	Skåne	Simrishamns kommun	Stenshuvuds nationalpark, Svabeholmsskog	55.6614	14.2687	Malaise trap	hornbeam forest
Dusona		bicoloripes	(Ashmead, 1906)	N.Meier	2020			1	1	99	999	Station Linné	dry	40	1811	2005.v.22	2005.vi.20	Sweden	Skåne	Simrishamns kommun	Stenshuvuds nationalpark, Svabeholmsskog	55.6614	14.2687	Malaise trap	hornbeam forest
Dusona		bicoloripes	(Ashmead, 1906)	N.Meier	2020			1	1	99	999	Station Linné	dry	40	1811	2005.v.22	2005.vi.20	Sweden	Skåne	Simrishamns kommun	Stenshuvuds nationalpark, Svabeholmsskog	55.6614	14.2687	Malaise trap	hornbeam forest
Dusona		bicoloripes	(Ashmead, 1906)	N.Meier	2020			1	1	99	999	Station Linné	dry	40	1811	2005.v.22	2005.vi.20	Sweden	Skåne	Simrishamns kommun	Stenshuvuds nationalpark, Svabeholmsskog	55.6614	14.2687	Malaise trap	hornbeam forest
Dusona		bicoloripes	(Ashmead, 1906)	N.Meier	2020			1	1	99	999	Station Linné	dry	40	1811	2005.v.22	2005.vi.20	Sweden	Skåne	Simrishamns kommun	Stenshuvuds nationalpark, Svabeholmsskog	55.6614	14.2687	Malaise trap	hornbeam forest
Dusona		bicoloripes	(Ashmead, 1906)	N.Meier	2020			1	1	99	999	Station Linné	dry	40	1811	2005.v.22	2005.vi.20	Sweden	Skåne	Simrishamns kommun	Stenshuvuds nationalpark, Svabeholmsskog	55.6614	14.2687	Malaise trap	hornbeam forest
Dusona		bicoloripes	(Ashmead, 1906)	N.Meier	2020			1	1	99	999	Station Linné	dry	40	1811	2005.v.22	2005.vi.20	Sweden	Skåne	Simrishamns kommun	Stenshuvuds nationalpark, Svabeholmsskog	55.6614	14.2687	Malaise trap	hornbeam forest
Dusona		bicoloripes	(Ashmead, 1906)	N.Meier	2020			1	1	99	999	Station Linné	dry	40	1811	2005.v.22	2005.vi.20	Sweden	Skåne	Simrishamns kommun	Stenshuvuds nationalpark, Svabeholmsskog	55.6614	14.2687	Malaise trap	hornbeam forest
Dusona		bicoloripes	(Ashmead, 1906)	N.Meier	2020			1	1	99	999	Station Linné	dry	40	1811	2005.v.22	2005.vi.20	Sweden	Skåne	Simrishamns kommun	Stenshuvuds nationalpark, Svabeholmsskog	55.6614	14.2687	Malaise trap	hornbeam forest
Dusona		bicoloripes	(Ashmead, 1906)	N.Meier	2020			1	1	99	999	Station Linné	dry	40	1811	2005.v.22	2005.vi.20	Sweden	Skåne	Simrishamns kommun	Stenshuvuds nationalpark, Svabeholmsskog	55.6614	14.2687	Malaise trap	hornbeam forest
Dusona		bicoloripes	(Ashmead, 1906)	N.Meier	2020			1	1	99	999	Station Linné	dry	40	1811	2005.v.22	2005.vi.20	Sweden	Skåne	Simrishamns kommun	Stenshuvuds nationalpark, Svabeholmsskog	55.6614	14.2687	Malaise trap	hornbeam forest
Dusona		bicoloripes	(Ashmead, 1906)	N.Meier	2020			1	1	99	999	Station Linné	dry	40	1812	2005.vi.20	2005.vi.26	Sweden	Skåne	Simrishamns kommun	Stenshuvuds nationalpark, Svabeholmsskog	55.6614	14.2687	Malaise trap	hornbeam forest
Dusona		bicoloripes	(Ashmead, 1906)	N.Meier	2020			1	1	99	999	Station Linné	dry	40	1811	2005.v.22	2005.vi.20	Sweden	Skåne	Simrishamns kommun	Stenshuvuds nationalpark, Svabeholmsskog	55.6614	14.2687	Malaise trap	hornbeam forest
Dusona		bicoloripes	(Ashmead, 1906)	N.Meier	2020			1	1	99	999	Station Linné	dry	40	1812	2005.vi.20	2005.vi.26	Sweden	Skåne	Simrishamns kommun	Stenshuvuds nationalpark, Svabeholmsskog	55.6614	14.2687	Malaise trap	hornbeam forest
Dusona		bicoloripes	(Ashmead, 1906)	N.Meier	2020			1	1	99	999	Station Linné	dry	40	1811	2005.v.22	2005.vi.20	Sweden	Skåne	Simrishamns kommun	Stenshuvuds nationalpark, Svabeholmsskog	55.6614	14.2687	Malaise trap	hornbeam forest
Dusona		bicoloripes	(Ashmead, 1906)	N.Meier	2020			1	1	99	999	Station Linné	dry	40	1811	2005.v.22	2005.vi.20	Sweden	Skåne	Simrishamns kommun	Stenshuvuds nationalpark, Svabeholmsskog	55.6614	14.2687	Malaise trap	hornbeam forest
Dusona		bicoloripes	(Ashmead, 1906)	N.Meier	2020			1	1	99	999	Station Linné	dry	40	1811	2005.v.22	2005.vi.20	Sweden	Skåne	Simrishamns kommun	Stenshuvuds nationalpark, Svabeholmsskog	55.6614	14.2687	Malaise trap	hornbeam forest
Dusona		bicoloripes	(Ashmead, 1906)	N.Meier	2020			1	1	99	999	Station Linné	dry	40	1811	2005.v.22	2005.vi.20	Sweden	Skåne	Simrishamns kommun	Stenshuvuds nationalpark, Svabeholmsskog	55.6614	14.2687	Malaise trap	hornbeam forest
Dusona		bicoloripes	(Ashmead, 1906)	N.Meier	2020			1	1	99	999	Station Linné	dry	40	1811	2005.v.22	2005.vi.20	Sweden	Skåne	Simrishamns kommun	Stenshuvuds nationalpark, Svabeholmsskog	55.6614	14.2687	Malaise trap	hornbeam forest
Dusona		bicoloripes	(Ashmead, 1906)	N.Meier	2020			1	1	99	999	Station Linné	dry	40	1811	2005.v.22	2005.vi.20	Sweden	Skåne	Simrishamns kommun	Stenshuvuds nationalpark, Svabeholmsskog	55.6614	14.2687	Malaise trap	hornbeam forest
Dusona		bicoloripes	(Ashmead, 1906)	N.Meier	2020			1	1	99	999	Station Linné	dry	40	1811	2005.v.22	2005.vi.20	Sweden	Skåne	Simrishamns kommun	Stenshuvuds nationalpark, Svabeholmsskog	55.6614	14.2687	Malaise trap	hornbeam forest
Dusona		bicoloripes	(Ashmead, 1906)	N.Meier	2020			1	1	99	999	Station Linné	dry	40	1812	2005.vi.20	2005.vi.26	Sweden	Skåne	Simrishamns kommun	Stenshuvuds nationalpark, Svabeholmsskog	55.6614	14.2687	Malaise trap	hornbeam forest
Dusona		bicoloripes	(Ashmead, 1906)	N.Meier	2020			1	1	99	999	Station Linné	dry	1000	1322	2005.vi.27	2005.vii.02	Sweden	Småland	Nybro kommun	Bäckebo, Grytsjöns naturreservat, Aspskog	56.9217	16.1012	Malaise trap	old aspen in boulder terrain
Dusona		bicoloripes	(Ashmead, 1906)	N.Meier	2020			1	1	99	999	Station Linné	dry	1001	1329	2005.vi.04	2005.vi.19	Sweden	Småland	Nybro kommun	Bäckebo, Grytsjöns naturreservat, Äng	56.9314	16.0855	Malaise trap	Old moisty haymaking meadow at edge of mixed forest
Dusona		bicoloripes	(Ashmead, 1906)	N.Meier	2020			1	1	99	999	Station Linné	dry	1003	1386	2005.vi.18	2005.vi.27	Sweden	Värmland	Munkfors kommun	Ransäter, Ransberg Herrgård	59.7904	13.4152	Malaise trap	Old mixed deciduous forest in stream ravine
Dusona		bicoloripes	(Ashmead, 1906)	N.Meier	2020			1	1	99	999	Station Linné	dry	1003	1386	2005.vi.18	2005.vi.27	Sweden	Värmland	Munkfors kommun	Ransäter, Ransberg Herrgård	59.7904	13.4152	Malaise trap	Old mixed deciduous forest in stream ravine
Dusona		bicoloripes	(Ashmead, 1906)	N.Meier	2020			1	1	99	999	Station Linné	dry	1006	1425	2005.vii.15	2005.vii.15	Sweden	Skåne	Ystad kommun	Sandhammaren, Järahusen, skog	55.4038	14.1999	Malaise trap	mixed oak forest on sand dunes
Dusona		bicoloripes	(Ashmead, 1906)	N.Meier	2020			1	1	99	999	Station Linné	dry	1006	1425	2005.vii.15	2005.vii.15	Sweden	Skåne	Ystad kommun	Sandhammaren, Järahusen, skog	55.4038	14.1999	Malaise trap	mixed oak forest on sand dunes
Dusona		bicoloripes	(Ashmead, 1906)	N.Meier	2020			1	1	99	999	Station Linné	dry	1008	1738	2006.vi.16	2006.vi.22	Sweden	Småland	Nybro kommun	Alsterbro/Alsterån	56.9365	15.9202	Malaise trap	Mixed forest
Dusona		bicoloripes	(Ashmead, 1906)	N.Meier	2020			1	1	99	999	Station Linné	dry	2003	2034	2006.vi.29	2006.vii.07	Sweden	Södermanland	Huddinge kommun	Sofielunds återvinningsanläggning, kadaverdeponi	59.1765	17.9938	Malaise trap	garbage dump – cadaver landfill
Dusona		bicoloripes	(Ashmead, 1906)	N.Meier	2020			1	1	99	999	Station Linné	dry	2003	2034	2006.vi.29	2006.vii.07	Sweden	Södermanland	Huddinge kommun	Sofielunds återvinningsanläggning, kadaverdeponi	59.1765	17.9938	Malaise trap	garbage dump – cadaver landfill
Dusona		bicoloripes	(Ashmead, 1906)	N.Meier	2020			1	1	99	999	Station Linné	dry	3001	3052	2014.vi.10	2014.vii.09	Sweden	Öland	Mörbylånga kommun	Västerstads almlund nature reserve	56.4276	16.4211	Malaise trap	almlund
Dusona		bicoloripes	(Ashmead, 1906)	N.Meier	2020			1	1	99	999	Station Linné	dry	3001	3052	2014.vi.10	2014.vii.09	Sweden	Öland	Mörbylånga kommun	Västerstads almlund nature reserve	56.4276	16.4211	Malaise trap	almlund
Dusona		bicoloripes	(Ashmead, 1906)	N.Meier	2020			1	1	99	999	Station Linné	dry	3001	3050	2014.v.15	2014.vi.09	Sweden	Öland	Mörbylånga kommun	Västerstads almlund nature reserve	56.4276	16.4211	Malaise trap	almlund
Dusona		bicoloripes	(Ashmead, 1906)	N.Meier	2020			1	1	99	999	Station Linné	dry	3001	3050	2014.v.15	2014.vi.09	Sweden	Öland	Mörbylånga kommun	Västerstads almlund nature reserve	56.4276	16.4211	Malaise trap	almlund
Dusona		bicoloripes	(Ashmead, 1906)	N.Meier	2020			1	1	99	999	Station Linné	dry	3002	3051	2014.v.15	2014.vi.09	Sweden	Öland	Mörbylånga kommun	Västerstads almlund nature reserve	56.4273	16.4219	Malaise trap	almlund
Dusona		bicoloripes	(Ashmead, 1906)	N.Meier	2020			1	1	99	999	Station Linné	dry	3002	3051	2014.v.15	2014.vi.09	Sweden	Öland	Mörbylånga kommun	Västerstads almlund nature reserve	56.4273	16.4219	Malaise trap	almlund
Dusona		blanda	(Förster, 1868)	N.Meier	2020			1	1	99	999	Station Linné	dry	7	1593	2005.vii.17	2005.viii.16	Sweden	Uppland	Älvkarleby kommun	Båtfors	60.4607	17.3178	Malaise trap	Mixed pine forest with blue berry
Dusona		blanda	(Förster, 1868)	N.Meier	2020		1		1	99	999	Station Linné	dry	8	1601	2005.v.20	2005.vi.20	Sweden	Uppland	Håbo kommun	Biskops-Arnö	59.6721	17.5008	Malaise trap	Elm grove
Dusona		blanda	(Förster, 1868)	N.Meier	2020			1	1	99	999	Station Linné	dry	8	1601	2005.v.20	2005.vi.20	Sweden	Uppland	Håbo kommun	Biskops-Arnö	59.6721	17.5008	Malaise trap	Elm grove
Dusona		blanda	(Förster, 1868)	N.Meier	2020			1	1	99	999	Station Linné	dry	15	1659	2005.v.28	2005.vii.05	Sweden	Östergötland	Ödeshögs kommun	Omberg, Storpissan	58.3349	14.655	Malaise trap	old Norway spruce wood
Dusona		blanda	(Förster, 1868)	N.Meier	2020			1	1	99	999	Station Linné	dry	22	1729	2006.vi.28	2006.vii.03	Sweden	Öland	Mörbylånga kommun	Gamla Skogsby (Kalkstad)	56.6167	16.5076	Malaise trap	meadow with shrub vegetation
Dusona		blanda	(Förster, 1868)	N.Meier	2020			1	1	99	999	Station Linné	dry	24	1672	2005.iv.30	2005.v.31	Sweden	Småland	Älmhults kommun	Stenbrohult, Djäknabygds bokbacke	56.6091	14.193	Malaise trap	heath with old beeches
Dusona		blanda	(Förster, 1868)	N.Meier	2020		1		1	99	999	Station Linné	dry	24	1674	2005.vii.20	2005.ix.05	Sweden	Småland	Älmhults kommun	Stenbrohult, Djäknabygds bokbacke	56.6091	14.193	Malaise trap	heath with old beeches
Dusona		blanda	(Förster, 1868)	N.Meier	2020		1		1	99	999	Station Linné	dry	24	1674	2005.vii.20	2005.ix.05	Sweden	Småland	Älmhults kommun	Stenbrohult, Djäknabygds bokbacke	56.6091	14.193	Malaise trap	heath with old beeches
Dusona		blanda	(Förster, 1868)	N.Meier	2020			1	1	99	999	Station Linné	dry	24	1674	2005.vii.20	2005.ix.05	Sweden	Småland	Älmhults kommun	Stenbrohult, Djäknabygds bokbacke	56.6091	14.193	Malaise trap	heath with old beeches
Dusona		blanda	(Förster, 1868)	N.Meier	2020			1	1	99	999	Station Linné	dry	31	1545	2005.v.26	2005.vi.23	Sweden	Bohuslän	Stenungsunds kommun	Kolhättan	58.1409	11.8562	Malaise trap	broad-leaved deciduous forest
Dusona		blanda	(Förster, 1868)	N.Meier	2020			1	1	99	999	Station Linné	dry	39	1801	2005.v.26	2005.vi.20	Sweden	Skåne	Simrishamns kommun	Stenshuvuds nationalpark, Krivarboden	55.6603	14.2755	Malaise trap	litter rich broad-leaved deciduous forest
Dusona		blanda	(Förster, 1868)	N.Meier	2020			1	1	99	999	Station Linné	dry	42	1166	2004.vii.04	2004.viii.04	Sweden	Härjedalen	Härejdalens kommun	Sånfjället, Nyvallens fäbod	62.3167	13.5686	Malaise trap	alpine birch and spruce wood
Dusona		blanda	(Förster, 1868)	N.Meier	2020			1	1	99	999	Station Linné	dry	43	1908	2005.vi.29	2005.vii.14	Sweden	Hälsingland	Hudiksvalls kommun	Stensjön-Lomtjärn	62.1403	16.2861	Malaise trap	marsh pine wood close to bog
Dusona		blanda	(Förster, 1868)	N.Meier	2020			1	1	99	999	Station Linné	dry	46	1945	2005.vi.27	2005.vii.17	Sweden	Lycksele lappmark	Sorsele kommun	Vindelfjällens naturreservat, Tjulträskluspen	65.9668	16.0605	Malaise trap	mountain birch forest
Dusona		blanda	(Förster, 1868)	N.Meier	2020			1	1	99	999	Station Linné	dry	46	1945	2005.vi.27	2005.vii.17	Sweden	Lycksele lappmark	Sorsele kommun	Vindelfjällens naturreservat, Tjulträskluspen	65.9668	16.0605	Malaise trap	mountain birch forest
Dusona		blanda	(Förster, 1868)	N.Meier	2020		1		1	99	999	Station Linné	dry	1001	1728	2006.v.18	2006.vi.15	Sweden	Småland	Nybro kommun	Bäckebo, Grytsjöns naturreservat, Äng	56.9314	16.0855	Malaise trap	Old moisty haymaking meadow at edge of mixed forest
Dusona		blanda	(Förster, 1868)	N.Meier	2020		1		1	99	999	Station Linné	dry	1001	1728	2006.v.18	2006.vi.15	Sweden	Småland	Nybro kommun	Bäckebo, Grytsjöns naturreservat, Äng	56.9314	16.0855	Malaise trap	Old moisty haymaking meadow at edge of mixed forest
Dusona		blanda	(Förster, 1868)	N.Meier	2020		1		1	99	999	Station Linné	dry	1001	1728	2006.v.18	2006.vi.15	Sweden	Småland	Nybro kommun	Bäckebo, Grytsjöns naturreservat, Äng	56.9314	16.0855	Malaise trap	Old moisty haymaking meadow at edge of mixed forest
Dusona		blanda	(Förster, 1868)	N.Meier	2020		1		1	99	999	Station Linné	dry	1001	1728	2006.v.18	2006.vi.15	Sweden	Småland	Nybro kommun	Bäckebo, Grytsjöns naturreservat, Äng	56.9314	16.0855	Malaise trap	Old moisty haymaking meadow at edge of mixed forest
Dusona		blanda	(Förster, 1868)	N.Meier	2020		1		1	99	999	Station Linné	dry	1001	1728	2006.v.18	2006.vi.15	Sweden	Småland	Nybro kommun	Bäckebo, Grytsjöns naturreservat, Äng	56.9314	16.0855	Malaise trap	Old moisty haymaking meadow at edge of mixed forest
Dusona		blanda	(Förster, 1868)	N.Meier	2020		1		1	99	999	Station Linné	dry	1001	1728	2006.v.18	2006.vi.15	Sweden	Småland	Nybro kommun	Bäckebo, Grytsjöns naturreservat, Äng	56.9314	16.0855	Malaise trap	Old moisty haymaking meadow at edge of mixed forest
Dusona		blanda	(Förster, 1868)	N.Meier	2020		1		1	99	999	Station Linné	dry	1001	1728	2006.v.18	2006.vi.15	Sweden	Småland	Nybro kommun	Bäckebo, Grytsjöns naturreservat, Äng	56.9314	16.0855	Malaise trap	Old moisty haymaking meadow at edge of mixed forest
Dusona		blanda	(Förster, 1868)	N.Meier	2020		1		1	99	999	Station Linné	dry	1001	1728	2006.v.18	2006.vi.15	Sweden	Småland	Nybro kommun	Bäckebo, Grytsjöns naturreservat, Äng	56.9314	16.0855	Malaise trap	Old moisty haymaking meadow at edge of mixed forest
Dusona		blanda	(Förster, 1868)	N.Meier	2020		1		1	99	999	Station Linné	dry	1001	1728	2006.v.18	2006.vi.15	Sweden	Småland	Nybro kommun	Bäckebo, Grytsjöns naturreservat, Äng	56.9314	16.0855	Malaise trap	Old moisty haymaking meadow at edge of mixed forest
Dusona		blanda	(Förster, 1868)	N.Meier	2020		1		1	99	999	Station Linné	dry	1001	1331	2005.vi.27	2005.vii.02	Sweden	Småland	Nybro kommun	Bäckebo, Grytsjöns naturreservat, Äng	56.9314	16.0855	Malaise trap	Old moisty haymaking meadow at edge of mixed forest
Dusona		blanda	(Förster, 1868)	N.Meier	2020		1		1	99	999	Station Linné	dry	1001	1728	2006.v.18	2006.vi.15	Sweden	Småland	Nybro kommun	Bäckebo, Grytsjöns naturreservat, Äng	56.9314	16.0855	Malaise trap	Old moisty haymaking meadow at edge of mixed forest
Dusona		blanda	(Förster, 1868)	N.Meier	2020		1		1	99	999	Station Linné	dry	1001	1728	2006.v.18	2006.vi.15	Sweden	Småland	Nybro kommun	Bäckebo, Grytsjöns naturreservat, Äng	56.9314	16.0855	Malaise trap	Old moisty haymaking meadow at edge of mixed forest
Dusona		blanda	(Förster, 1868)	N.Meier	2020		1		1	99	999	Station Linné	dry	1001	1728	2006.v.18	2006.vi.15	Sweden	Småland	Nybro kommun	Bäckebo, Grytsjöns naturreservat, Äng	56.9314	16.0855	Malaise trap	Old moisty haymaking meadow at edge of mixed forest
Dusona		blanda	(Förster, 1868)	N.Meier	2020		1		1	99	999	Station Linné	dry	1001	1728	2006.v.18	2006.vi.15	Sweden	Småland	Nybro kommun	Bäckebo, Grytsjöns naturreservat, Äng	56.9314	16.0855	Malaise trap	Old moisty haymaking meadow at edge of mixed forest
Dusona		blanda	(Förster, 1868)	N.Meier	2020		1		1	99	999	Station Linné	dry	1001	1728	2006.v.18	2006.vi.15	Sweden	Småland	Nybro kommun	Bäckebo, Grytsjöns naturreservat, Äng	56.9314	16.0855	Malaise trap	Old moisty haymaking meadow at edge of mixed forest
Dusona		blanda	(Förster, 1868)	N.Meier	2020		1		1	99	999	Station Linné	dry	1001	1728	2006.v.18	2006.vi.15	Sweden	Småland	Nybro kommun	Bäckebo, Grytsjöns naturreservat, Äng	56.9314	16.0855	Malaise trap	Old moisty haymaking meadow at edge of mixed forest
Dusona		blanda	(Förster, 1868)	N.Meier	2020		1		1	99	999	Station Linné	dry	1001	1728	2006.v.18	2006.vi.15	Sweden	Småland	Nybro kommun	Bäckebo, Grytsjöns naturreservat, Äng	56.9314	16.0855	Malaise trap	Old moisty haymaking meadow at edge of mixed forest
Dusona		blanda	(Förster, 1868)	N.Meier	2020		1		1	99	999	Station Linné	dry	1001	1728	2006.v.18	2006.vi.15	Sweden	Småland	Nybro kommun	Bäckebo, Grytsjöns naturreservat, Äng	56.9314	16.0855	Malaise trap	Old moisty haymaking meadow at edge of mixed forest
Dusona		blanda	(Förster, 1868)	N.Meier	2020			1	1	99	999	Station Linné	dry	1001	1728	2006.v.18	2006.vi.15	Sweden	Småland	Nybro kommun	Bäckebo, Grytsjöns naturreservat, Äng	56.9314	16.0855	Malaise trap	Old moisty haymaking meadow at edge of mixed forest
Dusona		blanda	(Förster, 1868)	N.Meier	2020			1	1	99	999	Station Linné	dry	1001	1728	2006.v.18	2006.vi.15	Sweden	Småland	Nybro kommun	Bäckebo, Grytsjöns naturreservat, Äng	56.9314	16.0855	Malaise trap	Old moisty haymaking meadow at edge of mixed forest
Dusona		blanda	(Förster, 1868)	N.Meier	2020			1	1	99	999	Station Linné	dry	1001	1355	2005.viii.13	2005.viii.24	Sweden	Småland	Nybro kommun	Bäckebo, Grytsjöns naturreservat, Äng	56.9314	16.0855	Malaise trap	Old moisty haymaking meadow at edge of mixed forest
Dusona		blanda	(Förster, 1868)	N.Meier	2020			1	1	99	999	Station Linné	dry	1001	1728	2006.v.18	2006.vi.15	Sweden	Småland	Nybro kommun	Bäckebo, Grytsjöns naturreservat, Äng	56.9314	16.0855	Malaise trap	Old moisty haymaking meadow at edge of mixed forest
Dusona		blanda	(Förster, 1868)	N.Meier	2020		1		1	99	999	Station Linné	dry	1001	1728	2006.v.18	2006.vi.15	Sweden	Småland	Nybro kommun	Bäckebo, Grytsjöns naturreservat, Äng	56.9314	16.0855	Malaise trap	Old moisty haymaking meadow at edge of mixed forest
Dusona		blanda	(Förster, 1868)	N.Meier	2020			1	1	99	999	Station Linné	dry	1001	1331	2005.vi.27	2005.vii.02	Sweden	Småland	Nybro kommun	Bäckebo, Grytsjöns naturreservat, Äng	56.9314	16.0855	Malaise trap	Old moisty haymaking meadow at edge of mixed forest
Dusona		blanda	(Förster, 1868)	N.Meier	2020			1	1	99	999	Station Linné	dry	1001	1355	2005.viii.13	2005.viii.24	Sweden	Småland	Nybro kommun	Bäckebo, Grytsjöns naturreservat, Äng	56.9314	16.0855	Malaise trap	Old moisty haymaking meadow at edge of mixed forest
Dusona		blanda	(Förster, 1868)	N.Meier	2020		1		1	99	999	Station Linné	dry	1001	1728	2006.v.18	2006.vi.15	Sweden	Småland	Nybro kommun	Bäckebo, Grytsjöns naturreservat, Äng	56.9314	16.0855	Malaise trap	Old moisty haymaking meadow at edge of mixed forest
Dusona		blanda	(Förster, 1868)	N.Meier	2020		1		1	99	999	Station Linné	dry	1003	1386	2005.vi.18	2005.vi.27	Sweden	Värmland	Munkfors kommun	Ransäter, Ransberg Herrgård	59.7904	13.4152	Malaise trap	Old mixed deciduous forest in stream ravine
Dusona		blanda	(Förster, 1868)	N.Meier	2020		1		1	99	999	Station Linné	dry	1003	1386	2005.vi.18	2005.vi.27	Sweden	Värmland	Munkfors kommun	Ransäter, Ransberg Herrgård	59.7904	13.4152	Malaise trap	Old mixed deciduous forest in stream ravine
Dusona		blanda	(Förster, 1868)	N.Meier	2020		1		1	99	999	Station Linné	dry	1003	1387	2005.vi.27	2005.vii.10	Sweden	Värmland	Munkfors kommun	Ransäter, Ransberg Herrgård	59.7904	13.4152	Malaise trap	Old mixed deciduous forest in stream ravine
Dusona		blanda	(Förster, 1868)	N.Meier	2020			1	1	99	999	Station Linné	dry	1003	1385	2005.vi.05	2005.vi.18	Sweden	Värmland	Munkfors kommun	Ransäter, Ransberg Herrgård	59.7904	13.4152	Malaise trap	Old mixed deciduous forest in stream ravine
Dusona		blanda	(Förster, 1868)	N.Meier	2020		1		1	99	999	Station Linné	dry	1003	1386	2005.vi.18	2005.vi.27	Sweden	Värmland	Munkfors kommun	Ransäter, Ransberg Herrgård	59.7904	13.4152	Malaise trap	Old mixed deciduous forest in stream ravine
Dusona		blanda	(Förster, 1868)	N.Meier	2020		1		1	99	999	Station Linné	dry	1006	1426	2005.vii.30	2005.ix.26	Sweden	Skåne	Ystad kommun	Sandhammaren, Järahusen, skog	55.4038	14.1999	Malaise trap	mixed oak forest on sand dunes
Dusona		blanda	(Förster, 1868)	N.Meier	2020		1		1	99	999	Station Linné	dry	1008	1737	2006.vi.10	2006.vi.16	Sweden	Småland	Nybro kommun	Alsterbro/Alsterån	56.9365	15.9202	Malaise trap	Mixed forest
Dusona		blanda	(Förster, 1868)	N.Meier	2020			1	1	99	999	Station Linné	dry	1008	1740	2006.vi.28	2006.vii.04	Sweden	Småland	Nybro kommun	Alsterbro/Alsterån	56.9365	15.9202	Malaise trap	Mixed forest
Dusona		blanda	(Förster, 1868)	N.Meier	2020		1		1	99	999	Station Linné	dry	2003	2034	2006.vi.29	2006.vii.07	Sweden	Södermanland	Huddinge kommun	Sofielunds återvinningsanläggning, kadaverdeponi	59.1765	17.9938	Malaise trap	garbage dump – cadaver landfill
Dusona		blanda	(Förster, 1868)	S.Klopfstein	2021			1	1	99	999	Station Linné	dry	7	378	2003.vi.17	2003.vii.03	Sweden	Uppland	Älvkarleby kommun	Båtfors	60.4607	17.3178	Malaise trap	Mixed pine forest with blue berry
Dusona		blanda	(Förster, 1868)	S.Klopfstein	2021			1	1	99	999	Station Linné	dry	7	858	2004.vi.27	2004.vii.01	Sweden	Uppland	Älvkarleby kommun	Båtfors	60.4607	17.3178	Malaise trap	Mixed pine forest with blue berry
Dusona		blanda	(Förster, 1868)	S.Klopfstein	2021			1	1	99	999	Station Linné	dry	7	380	2003.vii.29	2003.viii.12	Sweden	Uppland	Älvkarleby kommun	Båtfors	60.4607	17.3178	Malaise trap	Mixed pine forest with blue berry
Dusona		blanda	(Förster, 1868)	S.Klopfstein	2021			1	1	99	999	Station Linné	dry	7	380	2003.vii.29	2003.viii.12	Sweden	Uppland	Älvkarleby kommun	Båtfors	60.4607	17.3178	Malaise trap	Mixed pine forest with blue berry
Dusona		blanda	(Förster, 1868)	S.Klopfstein	2021			1	1	99	999	Station Linné	dry	7	378	2003.vi.17	2003.vii.03	Sweden	Uppland	Älvkarleby kommun	Båtfors	60.4607	17.3178	Malaise trap	Mixed pine forest with blue berry
Dusona		bucculenta	(Holmgren, 1860)	N.Meier	2020			1	1	99	999	Station Linné	dry	2006	2015	2007.vii.02	2007.vii.13	Sweden	Öland	Mörbylånga kommun	Ekologiska forskningsstationen, Skogsby	56.619	16.4973	Malaise trap	Lawn 100 m North of the Alvar edge
Dusona		bucculenta	(Holmgren, 1860)	N.Meier	2020			1	1	99	999	Station Linné	dry	2006	2016	2007.vii.13	2007.vii.24	Sweden	Öland	Mörbylånga kommun	Ekologiska forskningsstationen, Skogsby	56.619	16.4973	Malaise trap	Lawn 100 m North of the Alvar edge
Dusona		circumcinctus	(Förster, 1868)	N.Meier	2020		1		1	99	999	Station Linné	dry	7	1592	2005.vii.04	2005.vii.17	Sweden	Uppland	Älvkarleby kommun	Båtfors	60.4607	17.3178	Malaise trap	Mixed pine forest with blue berry
Dusona		circumcinctus	(Förster, 1868)	N.Meier	2020			1	1	99	999	Station Linné	dry	29	1397	2005.viii.15	2005.viii.26	Sweden	Gotland	Gotlands kommun	Rembs	56.9334	18.2688	Malaise trap	lichen-rich pine forest on sand dunes
Dusona		circumcinctus	(Förster, 1868)	N.Meier	2021			1	1	99	999	Station Linné	dry	7	380	2003.vii.29	2003.viii.12	Sweden	Uppland	Älvkarleby kommun	Båtfors	60.4607	17.3178	Malaise trap	Mixed pine forest with blue berry
Dusona		circumspectans	(Förster, 1868)	N.Meier	2020		1		1	99	999	Station Linné	dry	7	1593	2005.vii.17	2005.viii.16	Sweden	Uppland	Älvkarleby kommun	Båtfors	60.4607	17.3178	Malaise trap	Mixed pine forest with blue berry
Dusona		circumspectans	(Förster, 1868)	N.Meier	2020		1		1	99	999	Station Linné	dry	7	1590	2005.v.24	2005.vi.14	Sweden	Uppland	Älvkarleby kommun	Båtfors	60.4607	17.3178	Malaise trap	Mixed pine forest with blue berry
Dusona		circumspectans	(Förster, 1868)	N.Meier	2020		1		1	99	999	Station Linné	dry	11	1633	2005.v.22	2005.vi.06	Sweden	Västmanland	Sala kommun	Nötmyran (Västerfärnebo	59.942	16.3094	Malaise trap	hay meadow
Dusona		circumspectans	(Förster, 1868)	N.Meier	2020		1		1	99	999	Station Linné	dry	11	1634	2005.vi.06	2005.vi.23	Sweden	Västmanland	Sala kommun	Nötmyran (Västerfärnebo	59.942	16.3094	Malaise trap	hay meadow
Dusona		circumspectans	(Förster, 1868)	N.Meier	2020		1		1	99	999	Station Linné	dry	13	1645	2005.vii.20	2005.vii.26	Sweden	Östergötland	Ödeshögs kommun	Omberg, Stocklycke äng	58.3075	14.631	Malaise trap	lime meadow
Dusona		circumspectans	(Förster, 1868)	N.Meier	2020		1		1	99	999	Station Linné	dry	22	1316	2005.vii.18	2005.viii.01	Sweden	Öland	Mörbylånga kommun	Gamla Skogsby (Kalkstad)	56.6167	16.5076	Malaise trap	meadow with shrub vegetation
Dusona		circumspectans	(Förster, 1868)	N.Meier	2020		1		1	99	999	Station Linné	dry	22	1731	2006.vii.20	2006.viii.15	Sweden	Öland	Mörbylånga kommun	Gamla Skogsby (Kalkstad)	56.6167	16.5076	Malaise trap	meadow with shrub vegetation
Dusona		circumspectans	(Förster, 1868)	N.Meier	2020		1		1	99	999	Station Linné	dry	22	1731	2006.vii.20	2006.viii.15	Sweden	Öland	Mörbylånga kommun	Gamla Skogsby (Kalkstad)	56.6167	16.5076	Malaise trap	meadow with shrub vegetation
Dusona		circumspectans	(Förster, 1868)	N.Meier	2020		1		1	99	999	Station Linné	dry	28	1463	2004.ix.21	2005.iv.01	Sweden	Gotland	Gotlands kommun	Roleks	57.5368	18.3379	Malaise trap	border between mixed pine forest and open grazed calcareous pasture
Dusona		circumspectans	(Förster, 1868)	N.Meier	2020		1		1	99	999	Station Linné	dry	35	1787	2005.v.25	2005.vi.08	Sweden	Halland	Halmstad kommun	Gårdshult, Buskastycket	56.6949	13.1505	Malaise trap	moist hay meadow
Dusona		circumspectans	(Förster, 1868)	N.Meier	2020		1		1	99	999	Station Linné	dry	35	1787	2005.v.25	2005.vi.08	Sweden	Halland	Halmstad kommun	Gårdshult, Buskastycket	56.6949	13.1505	Malaise trap	moist hay meadow
Dusona		circumspectans	(Förster, 1868)	N.Meier	2020		1		1	99	999	Station Linné	dry	1001	1728	2006.v.18	2006.vi.15	Sweden	Småland	Nybro kommun	Bäckebo, Grytsjöns naturreservat, Äng	56.9314	16.0855	Malaise trap	Old moisty haymaking meadow at edge of mixed forest
Dusona		circumspectans	(Förster, 1868)	N.Meier	2020		1		1	99	999	Station Linné	dry	1001	1728	2006.v.18	2006.vi.15	Sweden	Småland	Nybro kommun	Bäckebo, Grytsjöns naturreservat, Äng	56.9314	16.0855	Malaise trap	Old moisty haymaking meadow at edge of mixed forest
Dusona		circumspectans	(Förster, 1868)	N.Meier	2020		1		1	99	999	Station Linné	dry	1001	1728	2006.v.18	2006.vi.15	Sweden	Småland	Nybro kommun	Bäckebo, Grytsjöns naturreservat, Äng	56.9314	16.0855	Malaise trap	Old moisty haymaking meadow at edge of mixed forest
Dusona		circumspectans	(Förster, 1868)	N.Meier	2020		1		1	99	999	Station Linné	dry	1001	1728	2006.v.18	2006.vi.15	Sweden	Småland	Nybro kommun	Bäckebo, Grytsjöns naturreservat, Äng	56.9314	16.0855	Malaise trap	Old moisty haymaking meadow at edge of mixed forest
Dusona		circumspectans	(Förster, 1868)	N.Meier	2020		1		1	99	999	Station Linné	dry	1001	1728	2006.v.18	2006.vi.15	Sweden	Småland	Nybro kommun	Bäckebo, Grytsjöns naturreservat, Äng	56.9314	16.0855	Malaise trap	Old moisty haymaking meadow at edge of mixed forest
Dusona		circumspectans	(Förster, 1868)	N.Meier	2020		1		1	99	999	Station Linné	dry	1001	1728	2006.v.18	2006.vi.15	Sweden	Småland	Nybro kommun	Bäckebo, Grytsjöns naturreservat, Äng	56.9314	16.0855	Malaise trap	Old moisty haymaking meadow at edge of mixed forest
Dusona		circumspectans	(Förster, 1868)	N.Meier	2020		1		1	99	999	Station Linné	dry	1002	1379	2005.viii.12	2005.viii.24	Sweden	Värmland	Munkfors kommun	Ransäter, Rudstorp	59.773	13.4737	Malaise trap	Sandy railway embankment through pasture-land
Dusona		circumspectans	(Förster, 1868)	N.Meier	2020		1		1	99	999	Station Linné	dry	1002	1378	2005.vii.23	2005.viii.12	Sweden	Värmland	Munkfors kommun	Ransäter, Rudstorp	59.773	13.4737	Malaise trap	Sandy railway embankment through pasture-land
Dusona		circumspectans	(Förster, 1868)	N.Meier	2020		1		1	99	999	Station Linné	dry	1002	1375	2005.vii.07	2005.vii.15	Sweden	Värmland	Munkfors kommun	Ransäter, Rudstorp	59.773	13.4737	Malaise trap	Sandy railway embankment through pasture-land
Dusona		circumspectans	(Förster, 1868)	N.Meier	2020		1		1	99	999	Station Linné	dry	1002	1378	2005.vii.23	2005.viii.12	Sweden	Värmland	Munkfors kommun	Ransäter, Rudstorp	59.773	13.4737	Malaise trap	Sandy railway embankment through pasture-land
Dusona		circumspectans	(Förster, 1868)	N.Meier	2020		1		1	99	999	Station Linné	dry	1002	1378	2005.vii.23	2005.viii.12	Sweden	Värmland	Munkfors kommun	Ransäter, Rudstorp	59.773	13.4737	Malaise trap	Sandy railway embankment through pasture-land
Dusona		circumspectans	(Förster, 1868)	N.Meier	2020		1		1	99	999	Station Linné	dry	2006	2011	2007.v.10	2007.v.22	Sweden	Öland	Mörbylånga kommun	Ekologiska forskningsstationen, Skogsby	56.619	16.4973	Malaise trap	Lawn 100 m North of the Alvar edge
Dusona		confusa	(Förster, 1868)	N.Meier	2020			1	1	99	999	Station Linné	dry	47	1956	2005.vii.15	2005.viii.16	Sweden	Lule lappmark	Jokkmokks kommun	Muddus nationalpark	66.7695	20.1114	Malaise trap	blueberry spruce forest
Dusona		cultrator	(Gravenhorst, 1829)	S.Klopfstein	2021			1	1	99	999	Station Linné	dry	7	858	2004.vi.27	2004.vii.01	Sweden	Uppland	Älvkarleby kommun	Båtfors	60.4607	17.3178	Malaise trap	Mixed pine forest with blue berry	20-259
Dusona		cultrator	(Gravenhorst, 1829)	S.Klopfstein	2021			1	1	99	999	Station Linné	dry	7	858	2004.vi.27	2004.vii.01	Sweden	Uppland	Älvkarleby kommun	Båtfors	60.4607	17.3178	Malaise trap	Mixed pine forest with blue berry
Dusona		flagellator	(J.C.Fabricius, 1793)	N.Meier	2020			1	1	99	999	Station Linné	dry	7	1592	2005.vii.04	2005.vii.17	Sweden	Uppland	Älvkarleby kommun	Båtfors	60.4607	17.3178	Malaise trap	Mixed pine forest with blue berry
Dusona		flagellator	(J.C.Fabricius, 1793)	N.Meier	2020		1		1	99	999	Station Linné	dry	1008	1741	2006.vii.04	2006.vii.10	Sweden	Småland	Nybro kommun	Alsterbro/Alsterån	56.9365	15.9202	Malaise trap	Mixed forest
Dusona		flagellator	(J.C.Fabricius, 1793)	N.Meier	2020			1	1	99	999	Station Linné	dry	1008	1743	2006.vii.16	2006.vii.22	Sweden	Småland	Nybro kommun	Alsterbro/Alsterån	56.9365	15.9202	Malaise trap	Mixed forest
Dusona		flagellator	(J.C.Fabricius, 1793)	N.Meier	2020			1	1	99	999	Station Linné	dry	1008	1743	2006.vii.16	2006.vii.22	Sweden	Småland	Nybro kommun	Alsterbro/Alsterån	56.9365	15.9202	Malaise trap	Mixed forest
Dusona		flagellator	(J.C.Fabricius, 1793)	N.Meier	2020			1	1	99	999	Station Linné	dry	2006	2016	2007.vii.13	2007.vii.24	Sweden	Öland	Mörbylånga kommun	Ekologiska forskningsstationen, Skogsby	56.619	16.4973	Malaise trap	Lawn 100 m North of the Alvar edge
Dusona		flagellator	(J.C.Fabricius, 1793)	S.Klopfstein	2021			1	1	99	999	Station Linné	dry	7	380	2003.vii.29	2003.viii.12	Sweden	Uppland	Älvkarleby kommun	Båtfors	60.4607	17.3178	Malaise trap	Mixed pine forest with blue berry
Dusona		flagellator	(J.C.Fabricius, 1793)	S.Klopfstein	2021			1	1	99	999	Station Linné	dry	7	379	2003.vii.03	2003.vii.29	Sweden	Uppland	Älvkarleby kommun	Båtfors	60.4607	17.3178	Malaise trap	Mixed pine forest with blue berry
Dusona		humilis	(Förster, 1868)	N.Meier	2020			1	1	99	999	Station Linné	dry	20	1496	2005.vi.03	2005.vi.26	Sweden	Öland	Mörbylånga kommun	Frösslunda alvar	56.5474	16.5772	Malaise trap	alvar pasture
Dusona		humilis	(Förster, 1868)	N.Meier	2020			1	1	99	999	Station Linné	dry	20	1496	2005.vi.03	2005.vi.26	Sweden	Öland	Mörbylånga kommun	Frösslunda alvar	56.5474	16.5772	Malaise trap	alvar pasture
Dusona		humilis	(Förster, 1868)	N.Meier	2020		1		1	99	999	Station Linné	dry	1001	1728	2006.v.18	2006.vi.15	Sweden	Småland	Nybro kommun	Bäckebo, Grytsjöns naturreservat, Äng	56.9314	16.0855	Malaise trap	Old moisty haymaking meadow at edge of mixed forest
Dusona		inermis	(Förster, 1868)	N.Meier	2020			1	1	99	999	Station Linné	dry	29	1397	2005.viii.15	2005.viii.26	Sweden	Gotland	Gotlands kommun	Rembs	56.9334	18.2688	Malaise trap	lichen-rich pine forest on sand dunes
Dusona		inermis	(Förster, 1868)	N.Meier	2020			1	1	99	999	Station Linné	dry	29	1397	2005.viii.15	2005.viii.26	Sweden	Gotland	Gotlands kommun	Rembs	56.9334	18.2688	Malaise trap	lichen-rich pine forest on sand dunes
Dusona		inermis	(Förster, 1868)	N.Meier	2020			1	1	99	999	Station Linné	dry	29	1397	2005.viii.15	2005.viii.26	Sweden	Gotland	Gotlands kommun	Rembs	56.9334	18.2688	Malaise trap	lichen-rich pine forest on sand dunes
Dusona		inermis	(Förster, 1868)	N.Meier	2020			1	1	99	999	Station Linné	dry	29	1398	2005.viii.26	2005.ix.16	Sweden	Gotland	Gotlands kommun	Rembs	56.9334	18.2688	Malaise trap	lichen-rich pine forest on sand dunes
Dusona		inermis	(Förster, 1868)	N.Meier	2020			1	1	99	999	Station Linné	dry	29	1397	2005.viii.15	2005.viii.26	Sweden	Gotland	Gotlands kommun	Rembs	56.9334	18.2688	Malaise trap	lichen-rich pine forest on sand dunes
Dusona		inermis	(Förster, 1868)	N.Meier	2020		1		1	99	999	Station Linné	dry	1006	1425	2005.vii.15	2005.vii.15	Sweden	Skåne	Ystad kommun	Sandhammaren, Järahusen, skog	55.4038	14.1999	Malaise trap	mixed oak forest on sand dunes
Dusona		inermis	(Förster, 1868)	N.Meier	2020		1		1	99	999	Station Linné	dry	1006	1425	2005.vii.15	2005.vii.15	Sweden	Skåne	Ystad kommun	Sandhammaren, Järahusen, skog	55.4038	14.1999	Malaise trap	mixed oak forest on sand dunes
Dusona		inermis	(Förster, 1868)	N.Meier	2020		1		1	99	999	Station Linné	dry	1006	1425	2005.vii.15	2005.vii.15	Sweden	Skåne	Ystad kommun	Sandhammaren, Järahusen, skog	55.4038	14.1999	Malaise trap	mixed oak forest on sand dunes
Dusona		inermis	(Förster, 1868)	N.Meier	2020			1	1	99	999	Station Linné	dry	1006	1425	2005.vii.15	2005.vii.15	Sweden	Skåne	Ystad kommun	Sandhammaren, Järahusen, skog	55.4038	14.1999	Malaise trap	mixed oak forest on sand dunes
Dusona		inermis	(Förster, 1868)	N.Meier	2020			1	1	99	999	Station Linné	dry	1006	1425	2005.vii.15	2005.vii.15	Sweden	Skåne	Ystad kommun	Sandhammaren, Järahusen, skog	55.4038	14.1999	Malaise trap	mixed oak forest on sand dunes
Dusona		inermis	(Förster, 1868)	N.Meier	2020			1	1	99	999	Station Linné	dry	1006	1425	2005.vii.15	2005.vii.15	Sweden	Skåne	Ystad kommun	Sandhammaren, Järahusen, skog	55.4038	14.1999	Malaise trap	mixed oak forest on sand dunes
Dusona		inermis	(Förster, 1868)	N.Meier	2020			1	1	99	999	Station Linné	dry	1006	1425	2005.vii.15	2005.vii.15	Sweden	Skåne	Ystad kommun	Sandhammaren, Järahusen, skog	55.4038	14.1999	Malaise trap	mixed oak forest on sand dunes
Dusona		inermis	(Förster, 1868)	N.Meier	2020			1	1	99	999	Station Linné	dry	1006	1902	2005.ix.26	2005.ix.26	Sweden	Skåne	Ystad kommun	Sandhammaren, Järahusen, skog	55.4038	14.1999	Malaise trap	mixed oak forest on sand dunes
Dusona		inermis	(Förster, 1868)	N.Meier	2020			1	1	99	999	Station Linné	dry	1006	1425	2005.vii.15	2005.vii.15	Sweden	Skåne	Ystad kommun	Sandhammaren, Järahusen, skog	55.4038	14.1999	Malaise trap	mixed oak forest on sand dunes
Dusona		inermis	(Förster, 1868)	N.Meier	2020		1		1	99	999	Station Linné	dry	1006	1426	2005.vii.30	2005.ix.26	Sweden	Skåne	Ystad kommun	Sandhammaren, Järahusen, skog	55.4038	14.1999	Malaise trap	mixed oak forest on sand dunes
Dusona		inermis	(Förster, 1868)	N.Meier	2020			1	1	99	999	Station Linné	dry	1008	1738	2006.vi.16	2006.vi.22	Sweden	Småland	Nybro kommun	Alsterbro/Alsterån	56.9365	15.9202	Malaise trap	Mixed forest
Dusona		inermis	(Förster, 1868)	N.Meier	2020			1	1	99	999	Station Linné	dry	1008	1743	2006.vii.16	2006.vii.22	Sweden	Småland	Nybro kommun	Alsterbro/Alsterån	56.9365	15.9202	Malaise trap	Mixed forest
Dusona		inermis	(Förster, 1868)	N.Meier	2020			1	1	99	999	Station Linné	dry	2003	2036	2006.vii.24	2006.viii.14	Sweden	Södermanland	Huddinge kommun	Sofielunds återvinningsanläggning, kadaverdeponi	59.1765	17.9938	Malaise trap	garbage dump – cadaver landfill
Dusona		inermis	(Förster, 1868)	N.Meier	2020			1	1	99	999	Station Linné	dry	2003	2037	2006.viii.14	2006.ix.08	Sweden	Södermanland	Huddinge kommun	Sofielunds återvinningsanläggning, kadaverdeponi	59.1765	17.9938	Malaise trap	garbage dump – cadaver landfill
Dusona		infesta	(Förster, 1868)	N.Meier	2020		1		1	99	999	Station Linné	dry	1001	1333	2005.vii.12	2005.vii.18	Sweden	Småland	Nybro kommun	Bäckebo, Grytsjöns naturreservat, Äng	56.9314	16.0855	Malaise trap	Old moisty haymaking meadow at edge of mixed forest
Dusona		insignita	(Förster, 1868)	N.Meier	2020			1	1	99	999	Station Linné	dry	22	1725	2006.v.20	2006.vi.28	Sweden	Öland	Mörbylånga kommun	Gamla Skogsby (Kalkstad)	56.6167	16.5076	Malaise trap	meadow with shrub vegetation
Dusona		insignita	(Förster, 1868)	N.Meier	2020			1	1	99	999	Station Linné	dry	39	1801	2005.v.26	2005.vi.20	Sweden	Skåne	Simrishamns kommun	Stenshuvuds nationalpark, Krivarboden	55.6603	14.2755	Malaise trap	litter rich broad-leaved deciduous forest
Dusona		insignita	(Förster, 1868)	N.Meier	2020			1	1	99	999	Station Linné	dry	3001	3050	2014.v.15	2014.vi.09	Sweden	Öland	Mörbylånga kommun	Västerstads almlund nature reserve	56.4276	16.4211	Malaise trap	almlund	20-257
Dusona		leptogaster	(Holmgren, 1860)	N.Meier	2020			1	1	99	999	Station Linné	dry	17	1515	2005.vi.15	2005.vii.01	Sweden	Småland	Gränna kommun	Lönnemålen	58.0489	14.573	Malaise trap	Norway spruce forest with big harvested ashes
Dusona		leptogaster	(Holmgren, 1860)	N.Meier	2020			1	1	99	999	Station Linné	dry	22	1725	2006.v.20	2006.vi.28	Sweden	Öland	Mörbylånga kommun	Gamla Skogsby (Kalkstad)	56.6167	16.5076	Malaise trap	meadow with shrub vegetation
Dusona		leptogaster	(Holmgren, 1860)	N.Meier	2020			1	1	99	999	Station Linné	dry	22	1725	2006.v.20	2006.vi.28	Sweden	Öland	Mörbylånga kommun	Gamla Skogsby (Kalkstad)	56.6167	16.5076	Malaise trap	meadow with shrub vegetation
Dusona		leptogaster	(Holmgren, 1860)	N.Meier	2020			1	1	99	999	Station Linné	dry	22	1725	2006.v.20	2006.vi.28	Sweden	Öland	Mörbylånga kommun	Gamla Skogsby (Kalkstad)	56.6167	16.5076	Malaise trap	meadow with shrub vegetation
Dusona		leptogaster	(Holmgren, 1860)	N.Meier	2020		1		1	99	999	Station Linné	dry	22	1313	2005.vi.01	2005.vi.15	Sweden	Öland	Mörbylånga kommun	Gamla Skogsby (Kalkstad)	56.6167	16.5076	Malaise trap	meadow with shrub vegetation
Dusona		leptogaster	(Holmgren, 1860)	N.Meier	2020		1		1	99	999	Station Linné	dry	22	1725	2006.v.20	2006.vi.28	Sweden	Öland	Mörbylånga kommun	Gamla Skogsby (Kalkstad)	56.6167	16.5076	Malaise trap	meadow with shrub vegetation
Dusona		leptogaster	(Holmgren, 1860)	N.Meier	2020			1	1	99	999	Station Linné	dry	22	1313	2005.vi.01	2005.vi.15	Sweden	Öland	Mörbylånga kommun	Gamla Skogsby (Kalkstad)	56.6167	16.5076	Malaise trap	meadow with shrub vegetation
Dusona		leptogaster	(Holmgren, 1860)	N.Meier	2020		1		1	99	999	Station Linné	dry	22	1725	2006.v.20	2006.vi.28	Sweden	Öland	Mörbylånga kommun	Gamla Skogsby (Kalkstad)	56.6167	16.5076	Malaise trap	meadow with shrub vegetation
Dusona		leptogaster	(Holmgren, 1860)	N.Meier	2020			1	1	99	999	Station Linné	dry	40	1812	2005.vi.20	2005.vi.26	Sweden	Skåne	Simrishamns kommun	Stenshuvuds nationalpark, Svabeholmsskog	55.6614	14.2687	Malaise trap	hornbeam forest
Dusona		leptogaster	(Holmgren, 1860)	N.Meier	2020			1	1	99	999	Station Linné	dry	40	1811	2005.v.22	2005.vi.20	Sweden	Skåne	Simrishamns kommun	Stenshuvuds nationalpark, Svabeholmsskog	55.6614	14.2687	Malaise trap	hornbeam forest	20-258
Dusona		leptogaster	(Holmgren, 1860)	N.Meier	2020			1	1	99	999	Station Linné	dry	1008	1737	2006.vi.10	2006.vi.16	Sweden	Småland	Nybro kommun	Alsterbro/Alsterån	56.9365	15.9202	Malaise trap	Mixed forest
Dusona		limnobia	(Thomson, 1887)	N.Meier	2020		1		1	99	999	Station Linné	dry	7	1593	2005.vii.17	2005.viii.16	Sweden	Uppland	Älvkarleby kommun	Båtfors	60.4607	17.3178	Malaise trap	Mixed pine forest with blue berry
Dusona		limnobia	(Thomson, 1887)	N.Meier	2020		1		1	99	999	Station Linné	dry	22	1312	2005.v.20	2005.vi.01	Sweden	Öland	Mörbylånga kommun	Gamla Skogsby (Kalkstad)	56.6167	16.5076	Malaise trap	meadow with shrub vegetation
Dusona		limnobia	(Thomson, 1887)	N.Meier	2020			1	1	99	999	Station Linné	dry	22	1729	2006.vi.28	2006.vii.03	Sweden	Öland	Mörbylånga kommun	Gamla Skogsby (Kalkstad)	56.6167	16.5076	Malaise trap	meadow with shrub vegetation
Dusona		limnobia	(Thomson, 1887)	N.Meier	2020		1		1	99	999	Station Linné	dry	43	1908	2005.vi.29	2005.vii.14	Sweden	Hälsingland	Hudiksvalls kommun	Stensjön-Lomtjärn	62.1403	16.2861	Malaise trap	marsh pine wood close to bog
Dusona		limnobia	(Thomson, 1887)	N.Meier	2020			1	1	99	999	Station Linné	dry	43	1908	2005.vi.29	2005.vii.14	Sweden	Hälsingland	Hudiksvalls kommun	Stensjön-Lomtjärn	62.1403	16.2861	Malaise trap	marsh pine wood close to bog
Dusona		limnobia	(Thomson, 1887)	N.Meier	2020			1	1	99	999	Station Linné	dry	43	1908	2005.vi.29	2005.vii.14	Sweden	Hälsingland	Hudiksvalls kommun	Stensjön-Lomtjärn	62.1403	16.2861	Malaise trap	marsh pine wood close to bog
Dusona		limnobia	(Thomson, 1887)	N.Meier	2020		1		1	99	999	Station Linné	dry	1001	1728	2006.v.18	2006.vi.15	Sweden	Småland	Nybro kommun	Bäckebo, Grytsjöns naturreservat, Äng	56.9314	16.0855	Malaise trap	Old moisty haymaking meadow at edge of mixed forest
Dusona		limnobia	(Thomson, 1887)	N.Meier	2020			1	1	99	999	Station Linné	dry	1002	1379	2005.viii.12	2005.viii.24	Sweden	Värmland	Munkfors kommun	Ransäter, Rudstorp	59.773	13.4737	Malaise trap	Sandy railway embankment through pasture-land
Dusona		limnobia	(Thomson, 1887)	N.Meier	2020			1	1	99	999	Station Linné	dry	1002	1375	2005.vii.07	2005.vii.15	Sweden	Värmland	Munkfors kommun	Ransäter, Rudstorp	59.773	13.4737	Malaise trap	Sandy railway embankment through pasture-land
Dusona		limnobia	(Thomson, 1887)	N.Meier	2020		1		1	99	999	Station Linné	dry	1002	1378	2005.vii.23	2005.viii.12	Sweden	Värmland	Munkfors kommun	Ransäter, Rudstorp	59.773	13.4737	Malaise trap	Sandy railway embankment through pasture-land
Dusona		limnobia	(Thomson, 1887)	N.Meier	2020			1	1	99	999	Station Linné	dry	1002	1375	2005.vii.07	2005.vii.15	Sweden	Värmland	Munkfors kommun	Ransäter, Rudstorp	59.773	13.4737	Malaise trap	Sandy railway embankment through pasture-land
Dusona		limnobia	(Thomson, 1887)	N.Meier	2020		1		1	99	999	Station Linné	dry	1003	1386	2005.vi.18	2005.vi.27	Sweden	Värmland	Munkfors kommun	Ransäter, Ransberg Herrgård	59.7904	13.4152	Malaise trap	Old mixed deciduous forest in stream ravine
Dusona		limnobia	(Thomson, 1887)	N.Meier	2020		1		1	99	999	Station Linné	dry	1003	1387	2005.vi.27	2005.vii.10	Sweden	Värmland	Munkfors kommun	Ransäter, Ransberg Herrgård	59.7904	13.4152	Malaise trap	Old mixed deciduous forest in stream ravine
Dusona		limnobia	(Thomson, 1887)	N.Meier	2020			1	1	99	999	Station Linné	dry	2046	2057	2008.viii.16	2008.ix.01	Sweden	Småland	Torsås Kommun	Söderåkra, Påboda	56.4347	16.0708	Malaise trap	Garden
Dusona		limnobia	(Thomson, 1887)	N.Meier	2020			1	1	99	999	Station Linné	dry	2046	2055	2008.vii.16	2008.viii.01	Sweden	Småland	Torsås Kommun	Söderåkra, Påboda	56.4347	16.0708	Malaise trap	Garden
Dusona		mercator	(Fabricius, 1793)	S.Klopfstein	2021			1	1	99	999	Station Linné	dry	7	380	2003.vii.29	2003.viii.12	Sweden	Uppland	Älvkarleby kommun	Båtfors	60.4607	17.3178	Malaise trap	Mixed pine forest with blue berry
Dusona		minor	(Provancher, 1879)	N.Meier	2020			1	1	99	999	Station Linné	dry	42	1167	2004.viii.04	2005.iv.20	Sweden	Härjedalen	Härejdalens kommun	Sånfjället, Nyvallens fäbod	62.3167	13.5686	Malaise trap	alpine birch and spruce wood
Dusona		nidulator	(Fabricius, 1804)	N.Meier	2020		1		1	99	999	Station Linné	dry	20	1496	2005.vi.03	2005.vi.26	Sweden	Öland	Mörbylånga kommun	Frösslunda alvar	56.5474	16.5772	Malaise trap	alvar pasture
Dusona		nidulator	(Fabricius, 1804)	N.Meier	2020			1	1	99	999	Station Linné	dry	20	1496	2005.vi.03	2005.vi.26	Sweden	Öland	Mörbylånga kommun	Frösslunda alvar	56.5474	16.5772	Malaise trap	alvar pasture
Dusona		nidulator	(Fabricius, 1804)	N.Meier	2020			1	1	99	999	Station Linné	dry	20	1496	2005.vi.03	2005.vi.26	Sweden	Öland	Mörbylånga kommun	Frösslunda alvar	56.5474	16.5772	Malaise trap	alvar pasture
Dusona		nidulator	(Fabricius, 1804)	N.Meier	2020		1		1	99	999	Station Linné	dry	38	1443	2005.v.24	2005.v.31	Sweden	Skåne	Tomelilla kommun	Drakamöllan	55.7618	14.1178	Malaise trap	common bent heath on sandy area
Dusona		nidulator	(Fabricius, 1804)	N.Meier	2020		1		1	99	999	Station Linné	dry	38	1446	2005.vi.13	2005.vi.20	Sweden	Skåne	Tomelilla kommun	Drakamöllan	55.7618	14.1178	Malaise trap	common bent heath on sandy area
Dusona		notabilis	(Förster, 1868)	N.Meier	2020		1		1	99	999	Station Linné	dry	43	1908	2005.vi.29	2005.vii.14	Sweden	Hälsingland	Hudiksvalls kommun	Stensjön-Lomtjärn	62.1403	16.2861	Malaise trap	marsh pine wood close to bog
Dusona		notabilis	(Förster, 1868)	N.Meier	2020		1		1	99	999	Station Linné	dry	43	1907	2005.vi.15	2005.vi.29	Sweden	Hälsingland	Hudiksvalls kommun	Stensjön-Lomtjärn	62.1403	16.2861	Malaise trap	marsh pine wood close to bog
Dusona		notabilis	(Förster, 1868)	N.Meier	2020		1		1	99	999	Station Linné	dry	43	1908	2005.vi.29	2005.vii.14	Sweden	Hälsingland	Hudiksvalls kommun	Stensjön-Lomtjärn	62.1403	16.2861	Malaise trap	marsh pine wood close to bog
Dusona		notabilis	(Förster, 1868)	N.Meier	2020		1		1	99	999	Station Linné	dry	43	1908	2005.vi.29	2005.vii.14	Sweden	Hälsingland	Hudiksvalls kommun	Stensjön-Lomtjärn	62.1403	16.2861	Malaise trap	marsh pine wood close to bog
Dusona		notabilis	(Förster, 1868)	N.Meier	2020		1		1	99	999	Station Linné	dry	43	1908	2005.vi.29	2005.vii.14	Sweden	Hälsingland	Hudiksvalls kommun	Stensjön-Lomtjärn	62.1403	16.2861	Malaise trap	marsh pine wood close to bog
Dusona		notabilis	(Förster, 1868)	N.Meier	2020		1		1	99	999	Station Linné	dry	43	1907	2005.vi.15	2005.vi.29	Sweden	Hälsingland	Hudiksvalls kommun	Stensjön-Lomtjärn	62.1403	16.2861	Malaise trap	marsh pine wood close to bog
Dusona		notabilis	(Förster, 1868)	N.Meier	2020		1		1	99	999	Station Linné	dry	43	1907	2005.vi.15	2005.vi.29	Sweden	Hälsingland	Hudiksvalls kommun	Stensjön-Lomtjärn	62.1403	16.2861	Malaise trap	marsh pine wood close to bog
Dusona		obliterata	(Holmgren, 1872)	S.Klopfstein	2021			1	1	99	999	Station Linné	dry	7	379	2003.vii.03	2003.vii.29	Sweden	Uppland	Älvkarleby kommun	Båtfors	60.4607	17.3178	Malaise trap	Mixed pine forest with blue berry
Dusona		obliterata	(Holmgren, 1872)	S.Klopfstein	2021			1	1	99	999	Station Linné	dry	7	858	2004.vi.27	2004.vii.01	Sweden	Uppland	Älvkarleby kommun	Båtfors	60.4607	17.3178	Malaise trap	Mixed pine forest with blue berry
Dusona		obliterata	(Holmgren, 1872)	S.Klopfstein	2021			1	1	99	999	Station Linné	dry	7	379	2003.vii.03	2003.vii.29	Sweden	Uppland	Älvkarleby kommun	Båtfors	60.4607	17.3178	Malaise trap	Mixed pine forest with blue berry	20-260
Dusona		obliterata	(Holmgren, 1872)	S.Klopfstein	2021			1	1	99	999	Station Linné	dry	7	380	2003.vii.29	2003.viii.12	Sweden	Uppland	Älvkarleby kommun	Båtfors	60.4607	17.3178	Malaise trap	Mixed pine forest with blue berry
Dusona		obliterata	(Holmgren, 1872)	S.Klopfstein	2021			1	1	99	999	Station Linné	dry	7	380	2003.vii.29	2003.viii.12	Sweden	Uppland	Älvkarleby kommun	Båtfors	60.4607	17.3178	Malaise trap	Mixed pine forest with blue berry
Dusona		opaca	(Thomson, 1887)	N.Meier	2020		1		1	99	999	Station Linné	dry	1003	1386	2005.vi.18	2005.vi.27	Sweden	Värmland	Munkfors kommun	Ransäter, Ransberg Herrgård	59.7904	13.4152	Malaise trap	Old mixed deciduous forest in stream ravine
Dusona		prominula	(Förster, 1868)	N.Meier	2020			1	1	99	999	Station Linné	dry	22	1725	2006.v.20	2006.vi.28	Sweden	Öland	Mörbylånga kommun	Gamla Skogsby (Kalkstad)	56.6167	16.5076	Malaise trap	meadow with shrub vegetation
Dusona		prominula	(Förster, 1868)	N.Meier	2020			1	1	99	999	Station Linné	dry	22	1725	2006.v.20	2006.vi.28	Sweden	Öland	Mörbylånga kommun	Gamla Skogsby (Kalkstad)	56.6167	16.5076	Malaise trap	meadow with shrub vegetation
Dusona		prominula	(Förster, 1868)	N.Meier	2020			1	1	99	999	Station Linné	dry	22	1314	2005.vi.15	2005.vi.29	Sweden	Öland	Mörbylånga kommun	Gamla Skogsby (Kalkstad)	56.6167	16.5076	Malaise trap	meadow with shrub vegetation
Dusona		prominula	(Förster, 1868)	N.Meier	2020			1	1	99	999	Station Linné	dry	22	1725	2006.v.20	2006.vi.28	Sweden	Öland	Mörbylånga kommun	Gamla Skogsby (Kalkstad)	56.6167	16.5076	Malaise trap	meadow with shrub vegetation
Dusona		prominula	(Förster, 1868)	N.Meier	2020			1	1	99	999	Station Linné	dry	22	1725	2006.v.20	2006.vi.28	Sweden	Öland	Mörbylånga kommun	Gamla Skogsby (Kalkstad)	56.6167	16.5076	Malaise trap	meadow with shrub vegetation
Dusona		prominula	(Förster, 1868)	N.Meier	2020			1	1	99	999	Station Linné	dry	22	1313	2005.vi.01	2005.vi.15	Sweden	Öland	Mörbylånga kommun	Gamla Skogsby (Kalkstad)	56.6167	16.5076	Malaise trap	meadow with shrub vegetation
Dusona		prominula	(Förster, 1868)	N.Meier	2020			1	1	99	999	Station Linné	dry	22	1725	2006.v.20	2006.vi.28	Sweden	Öland	Mörbylånga kommun	Gamla Skogsby (Kalkstad)	56.6167	16.5076	Malaise trap	meadow with shrub vegetation
Dusona		prominula	(Förster, 1868)	N.Meier	2020			1	1	99	999	Station Linné	dry	22	1725	2006.v.20	2006.vi.28	Sweden	Öland	Mörbylånga kommun	Gamla Skogsby (Kalkstad)	56.6167	16.5076	Malaise trap	meadow with shrub vegetation
Dusona		prominula	(Förster, 1868)	N.Meier	2020			1	1	99	999	Station Linné	dry	22	1313	2005.vi.01	2005.vi.15	Sweden	Öland	Mörbylånga kommun	Gamla Skogsby (Kalkstad)	56.6167	16.5076	Malaise trap	meadow with shrub vegetation
Dusona		prominula	(Förster, 1868)	N.Meier	2020			1	1	99	999	Station Linné	dry	22	1725	2006.v.20	2006.vi.28	Sweden	Öland	Mörbylånga kommun	Gamla Skogsby (Kalkstad)	56.6167	16.5076	Malaise trap	meadow with shrub vegetation
Dusona		prominula	(Förster, 1868)	N.Meier	2020		1		1	99	999	Station Linné	dry	22	1313	2005.vi.01	2005.vi.15	Sweden	Öland	Mörbylånga kommun	Gamla Skogsby (Kalkstad)	56.6167	16.5076	Malaise trap	meadow with shrub vegetation
Dusona		prominula	(Förster, 1868)	N.Meier	2020		1		1	99	999	Station Linné	dry	22	1725	2006.v.20	2006.vi.28	Sweden	Öland	Mörbylånga kommun	Gamla Skogsby (Kalkstad)	56.6167	16.5076	Malaise trap	meadow with shrub vegetation
Dusona		prominula	(Förster, 1868)	N.Meier	2020		1		1	99	999	Station Linné	dry	22	1312	2005.v.20	2005.vi.01	Sweden	Öland	Mörbylånga kommun	Gamla Skogsby (Kalkstad)	56.6167	16.5076	Malaise trap	meadow with shrub vegetation
Dusona		prominula	(Förster, 1868)	N.Meier	2020		1		1	99	999	Station Linné	dry	22	1725	2006.v.20	2006.vi.28	Sweden	Öland	Mörbylånga kommun	Gamla Skogsby (Kalkstad)	56.6167	16.5076	Malaise trap	meadow with shrub vegetation
Dusona		prominula	(Förster, 1868)	N.Meier	2020			1	1	99	999	Station Linné	dry	22	1314	2005.vi.15	2005.vi.29	Sweden	Öland	Mörbylånga kommun	Gamla Skogsby (Kalkstad)	56.6167	16.5076	Malaise trap	meadow with shrub vegetation
Dusona		prominula	(Förster, 1868)	N.Meier	2020			1	1	99	999	Station Linné	dry	22	1314	2005.vi.15	2005.vi.29	Sweden	Öland	Mörbylånga kommun	Gamla Skogsby (Kalkstad)	56.6167	16.5076	Malaise trap	meadow with shrub vegetation
Dusona		prominula	(Förster, 1868)	N.Meier	2020			1	1	99	999	Station Linné	dry	22	1313	2005.vi.01	2005.vi.15	Sweden	Öland	Mörbylånga kommun	Gamla Skogsby (Kalkstad)	56.6167	16.5076	Malaise trap	meadow with shrub vegetation
Dusona		prominula	(Förster, 1868)	N.Meier	2020			1	1	99	999	Station Linné	dry	22	1313	2005.vi.01	2005.vi.15	Sweden	Öland	Mörbylånga kommun	Gamla Skogsby (Kalkstad)	56.6167	16.5076	Malaise trap	meadow with shrub vegetation
Dusona		prominula	(Förster, 1868)	N.Meier	2020			1	1	99	999	Station Linné	dry	22	1313	2005.vi.01	2005.vi.15	Sweden	Öland	Mörbylånga kommun	Gamla Skogsby (Kalkstad)	56.6167	16.5076	Malaise trap	meadow with shrub vegetation
Dusona		prominula	(Förster, 1868)	N.Meier	2020		1		1	99	999	Station Linné	dry	22	1313	2005.vi.01	2005.vi.15	Sweden	Öland	Mörbylånga kommun	Gamla Skogsby (Kalkstad)	56.6167	16.5076	Malaise trap	meadow with shrub vegetation
Dusona		prominula	(Förster, 1868)	N.Meier	2020		1		1	99	999	Station Linné	dry	22	1313	2005.vi.01	2005.vi.15	Sweden	Öland	Mörbylånga kommun	Gamla Skogsby (Kalkstad)	56.6167	16.5076	Malaise trap	meadow with shrub vegetation
Dusona		prominula	(Förster, 1868)	N.Meier	2020			1	1	99	999	Station Linné	dry	22	1314	2005.vi.15	2005.vi.29	Sweden	Öland	Mörbylånga kommun	Gamla Skogsby (Kalkstad)	56.6167	16.5076	Malaise trap	meadow with shrub vegetation
Dusona		prominula	(Förster, 1868)	N.Meier	2020			1	1	99	999	Station Linné	dry	22	1313	2005.vi.01	2005.vi.15	Sweden	Öland	Mörbylånga kommun	Gamla Skogsby (Kalkstad)	56.6167	16.5076	Malaise trap	meadow with shrub vegetation
Dusona		prominula	(Förster, 1868)	N.Meier	2020			1	1	99	999	Station Linné	dry	22	1725	2006.v.20	2006.vi.28	Sweden	Öland	Mörbylånga kommun	Gamla Skogsby (Kalkstad)	56.6167	16.5076	Malaise trap	meadow with shrub vegetation
Dusona		prominula	(Förster, 1868)	N.Meier	2020			1	1	99	999	Station Linné	dry	22	1313	2005.vi.01	2005.vi.15	Sweden	Öland	Mörbylånga kommun	Gamla Skogsby (Kalkstad)	56.6167	16.5076	Malaise trap	meadow with shrub vegetation
Dusona		prominula	(Förster, 1868)	N.Meier	2020			1	1	99	999	Station Linné	dry	22	1725	2006.v.20	2006.vi.28	Sweden	Öland	Mörbylånga kommun	Gamla Skogsby (Kalkstad)	56.6167	16.5076	Malaise trap	meadow with shrub vegetation
Dusona		prominula	(Förster, 1868)	N.Meier	2020			1	1	99	999	Station Linné	dry	22	1725	2006.v.20	2006.vi.28	Sweden	Öland	Mörbylånga kommun	Gamla Skogsby (Kalkstad)	56.6167	16.5076	Malaise trap	meadow with shrub vegetation
Dusona		prominula	(Förster, 1868)	N.Meier	2020			1	1	99	999	Station Linné	dry	22	1314	2005.vi.15	2005.vi.29	Sweden	Öland	Mörbylånga kommun	Gamla Skogsby (Kalkstad)	56.6167	16.5076	Malaise trap	meadow with shrub vegetation
Dusona		prominula	(Förster, 1868)	N.Meier	2020			1	1	99	999	Station Linné	dry	22	1313	2005.vi.01	2005.vi.15	Sweden	Öland	Mörbylånga kommun	Gamla Skogsby (Kalkstad)	56.6167	16.5076	Malaise trap	meadow with shrub vegetation
Dusona		prominula	(Förster, 1868)	N.Meier	2020			1	1	99	999	Station Linné	dry	22	1725	2006.v.20	2006.vi.28	Sweden	Öland	Mörbylånga kommun	Gamla Skogsby (Kalkstad)	56.6167	16.5076	Malaise trap	meadow with shrub vegetation
Dusona		prominula	(Förster, 1868)	N.Meier	2020			1	1	99	999	Station Linné	dry	22	1313	2005.vi.01	2005.vi.15	Sweden	Öland	Mörbylånga kommun	Gamla Skogsby (Kalkstad)	56.6167	16.5076	Malaise trap	meadow with shrub vegetation
Dusona		prominula	(Förster, 1868)	N.Meier	2020			1	1	99	999	Station Linné	dry	22	1725	2006.v.20	2006.vi.28	Sweden	Öland	Mörbylånga kommun	Gamla Skogsby (Kalkstad)	56.6167	16.5076	Malaise trap	meadow with shrub vegetation
Dusona		prominula	(Förster, 1868)	N.Meier	2020			1	1	99	999	Station Linné	dry	22	1725	2006.v.20	2006.vi.28	Sweden	Öland	Mörbylånga kommun	Gamla Skogsby (Kalkstad)	56.6167	16.5076	Malaise trap	meadow with shrub vegetation
Dusona		prominula	(Förster, 1868)	N.Meier	2020			1	1	99	999	Station Linné	dry	22	1314	2005.vi.15	2005.vi.29	Sweden	Öland	Mörbylånga kommun	Gamla Skogsby (Kalkstad)	56.6167	16.5076	Malaise trap	meadow with shrub vegetation
Dusona		prominula	(Förster, 1868)	N.Meier	2020		1		1	99	999	Station Linné	dry	22	1725	2006.v.20	2006.vi.28	Sweden	Öland	Mörbylånga kommun	Gamla Skogsby (Kalkstad)	56.6167	16.5076	Malaise trap	meadow with shrub vegetation
Dusona		prominula	(Förster, 1868)	N.Meier	2020			1	1	99	999	Station Linné	dry	39	1801	2005.v.26	2005.vi.20	Sweden	Skåne	Simrishamns kommun	Stenshuvuds nationalpark, Krivarboden	55.6603	14.2755	Malaise trap	litter rich broad-leaved deciduous forest
Dusona		prominula	(Förster, 1868)	N.Meier	2020			1	1	99	999	Station Linné	dry	39	1801	2005.v.26	2005.vi.20	Sweden	Skåne	Simrishamns kommun	Stenshuvuds nationalpark, Krivarboden	55.6603	14.2755	Malaise trap	litter rich broad-leaved deciduous forest
Dusona		prominula	(Förster, 1868)	N.Meier	2020			1	1	99	999	Station Linné	dry	39	1801	2005.v.26	2005.vi.20	Sweden	Skåne	Simrishamns kommun	Stenshuvuds nationalpark, Krivarboden	55.6603	14.2755	Malaise trap	litter rich broad-leaved deciduous forest
Dusona		prominula	(Förster, 1868)	N.Meier	2020			1	1	99	999	Station Linné	dry	39	1802	2005.vi.20	2005.vi.26	Sweden	Skåne	Simrishamns kommun	Stenshuvuds nationalpark, Krivarboden	55.6603	14.2755	Malaise trap	litter rich broad-leaved deciduous forest
Dusona		prominula	(Förster, 1868)	N.Meier	2020			1	1	99	999	Station Linné	dry	40	1811	2005.v.22	2005.vi.20	Sweden	Skåne	Simrishamns kommun	Stenshuvuds nationalpark, Svabeholmsskog	55.6614	14.2687	Malaise trap	hornbeam forest
Dusona		prominula	(Förster, 1868)	N.Meier	2020			1	1	99	999	Station Linné	dry	40	1811	2005.v.22	2005.vi.20	Sweden	Skåne	Simrishamns kommun	Stenshuvuds nationalpark, Svabeholmsskog	55.6614	14.2687	Malaise trap	hornbeam forest
Dusona		prominula	(Förster, 1868)	N.Meier	2020			1	1	99	999	Station Linné	dry	40	1811	2005.v.22	2005.vi.20	Sweden	Skåne	Simrishamns kommun	Stenshuvuds nationalpark, Svabeholmsskog	55.6614	14.2687	Malaise trap	hornbeam forest
Dusona		prominula	(Förster, 1868)	N.Meier	2020			1	1	99	999	Station Linné	dry	3001	3052	2014.vi.10	2014.vii.09	Sweden	Öland	Mörbylånga kommun	Västerstads almlund nature reserve	56.4276	16.4211	Malaise trap	almlund	20-256
Dusona		prominula	(Förster, 1868)	N.Meier	2020			1	1	99	999	Station Linné	dry	3001	3052	2014.vi.10	2014.vii.09	Sweden	Öland	Mörbylånga kommun	Västerstads almlund nature reserve	56.4276	16.4211	Malaise trap	almlund
Dusona		pugillator	(Linnaeus, 1758)	N.Meier	2020			1	1	99	999	Station Linné	dry	1006	1426	2005.vii.30	2005.ix.26	Sweden	Skåne	Ystad kommun	Sandhammaren, Järahusen, skog	55.4038	14.1999	Malaise trap	mixed oak forest on sand dunes
Dusona		pulchripes	(Holmgren, 1872)	N.Meier	2020		1		1	99	999	Station Linné	dry	20	1495	2005.v.09	2005.vi.03	Sweden	Öland	Mörbylånga kommun	Frösslunda alvar	56.5474	16.5772	Malaise trap	alvar pasture
Dusona		pulchripes	(Holmgren, 1872)	N.Meier	2020		1		1	99	999	Station Linné	dry	20	1495	2005.v.09	2005.vi.03	Sweden	Öland	Mörbylånga kommun	Frösslunda alvar	56.5474	16.5772	Malaise trap	alvar pasture
Dusona		pulchripes	(Holmgren, 1872)	N.Meier	2020		1		1	99	999	Station Linné	dry	20	1495	2005.v.09	2005.vi.03	Sweden	Öland	Mörbylånga kommun	Frösslunda alvar	56.5474	16.5772	Malaise trap	alvar pasture
Dusona		pulchripes	(Holmgren, 1872)	N.Meier	2020		1		1	99	999	Station Linné	dry	20	1496	2005.vi.03	2005.vi.26	Sweden	Öland	Mörbylånga kommun	Frösslunda alvar	56.5474	16.5772	Malaise trap	alvar pasture
Dusona		pulchripes	(Holmgren, 1872)	N.Meier	2020			1	1	99	999	Station Linné	dry	20	1496	2005.vi.03	2005.vi.26	Sweden	Öland	Mörbylånga kommun	Frösslunda alvar	56.5474	16.5772	Malaise trap	alvar pasture
Dusona		rubidatae	Horstmann, 2009	N.Meier	2020			1	1	99	999	Station Linné	dry	7	1592	2005.vii.04	2005.vii.17	Sweden	Uppland	Älvkarleby kommun	Båtfors	60.4607	17.3178	Malaise trap	Mixed pine forest with blue berry
Dusona		rubidatae	Horstmann, 2009	N.Meier	2020			1	1	99	999	Station Linné	dry	7	1592	2005.vii.04	2005.vii.17	Sweden	Uppland	Älvkarleby kommun	Båtfors	60.4607	17.3178	Malaise trap	Mixed pine forest with blue berry
Dusona		rubidatae	Horstmann, 2009	N.Meier	2020			1	1	99	999	Station Linné	dry	7	1592	2005.vii.04	2005.vii.17	Sweden	Uppland	Älvkarleby kommun	Båtfors	60.4607	17.3178	Malaise trap	Mixed pine forest with blue berry
Dusona		rubidatae	Horstmann, 2009	N.Meier	2020			1	1	99	999	Station Linné	dry	7	1593	2005.vii.17	2005.viii.16	Sweden	Uppland	Älvkarleby kommun	Båtfors	60.4607	17.3178	Malaise trap	Mixed pine forest with blue berry
Dusona		rubidatae	Horstmann, 2009	N.Meier	2021			1	1	99	999	Station Linné	dry	7	380	2003.vii.29	2003.viii.12	Sweden	Uppland	Älvkarleby kommun	Båtfors	60.4607	17.3178	Malaise trap	Mixed pine forest with blue berry
Dusona		rubidatae	Horstmann, 2009	N.Meier	2021		1		1	99	999	Station Linné	dry	7	858	2004.vi.27	2004.vii.01	Sweden	Uppland	Älvkarleby kommun	Båtfors	60.4607	17.3178	Malaise trap	Mixed pine forest with blue berry
Dusona		rubidatae	Horstmann, 2009	N.Meier	2021		1		1	99	999	Station Linné	dry	7	858	2004.vi.27	2004.vii.01	Sweden	Uppland	Älvkarleby kommun	Båtfors	60.4607	17.3178	Malaise trap	Mixed pine forest with blue berry
Dusona		sobolicida	(Förster, 1868)	N.Meier	2020			1	1	99	999	Station Linné	dry	3	799	2004.vii.20	2004.viii.11	Sweden	Södermanland	Haninge kommun	Tyresta, Urskogsslingan	59.1768	18.2469	Malaise trap	Tall, flat-rock pine forest
Dusona		sobolicida	(Förster, 1868)	N.Meier	2020			1	1	99	999	Station Linné	dry	43	1908	2005.vi.29	2005.vii.14	Sweden	Hälsingland	Hudiksvalls kommun	Stensjön-Lomtjärn	62.1403	16.2861	Malaise trap	marsh pine wood close to bog
Dusona		sobolicida	(Förster, 1868)	N.Meier	2020			1	1	99	999	Station Linné	dry	50	1223	2004.vii.08	2004.viii.05	Sweden	Torne lappmark	Kiruna kommun	Abisko nationalpark, fjällbjörkskog	68.3539	18.7822	Malaise trap	dry mountain birch forest
Dusona		sobolicida	(Förster, 1868)	N.Meier	2020		1		1	99	999	Station Linné	dry	1004	1797	2005.vi.27	2005.vii.30	Sweden	Skåne	Höganäs kommun	Kullabergs naturreservat, between Hjortstugan and Ransvik	56.2916	12.4825	Malaise trap	Oak forest in southern slope
Dusona		sobolicida	(Förster, 1868)	N.Meier	2020			1	1	99	999	Station Linné	dry	1006	1426	2005.vii.30	2005.ix.26	Sweden	Skåne	Ystad kommun	Sandhammaren, Järahusen, skog	55.4038	14.1999	Malaise trap	mixed oak forest on sand dunes
Dusona		sp.	Cameron, 1901	N.Meier	2021	sagitattae (NMr) or habermehli, det. S.Klopfstein		1	1	99	999	Station Linné	dry	7	379	2003.vii.03	2003.vii.29	Sweden	Uppland	Älvkarleby kommun	Båtfors	60.4607	17.3178	Malaise trap	Mixed pine forest with blue berry
Dusona		stragifex	(Förster, 1868)	S.Klopfstein	2021			1	1	99	999	Station Linné	dry	7	858	2004.vi.27	2004.vii.01	Sweden	Uppland	Älvkarleby kommun	Båtfors	60.4607	17.3178	Malaise trap	Mixed pine forest with blue berry
Dusona		stragifex	(Förster, 1868)	S.Klopfstein	2021		1		1	99	999	Station Linné	dry	7	380	2003.vii.29	2003.viii.12	Sweden	Uppland	Älvkarleby kommun	Båtfors	60.4607	17.3178	Malaise trap	Mixed pine forest with blue berry
Dusona		stragifex	(Förster, 1868)	S.Klopfstein	2021			1	1	99	999	Station Linné	dry	7	380	2003.vii.29	2003.viii.12	Sweden	Uppland	Älvkarleby kommun	Båtfors	60.4607	17.3178	Malaise trap	Mixed pine forest with blue berry
Dusona		stragifex	(Förster, 1868)	S.Klopfstein	2021			1	1	99	999	Station Linné	dry	7	858	2004.vi.27	2004.vii.01	Sweden	Uppland	Älvkarleby kommun	Båtfors	60.4607	17.3178	Malaise trap	Mixed pine forest with blue berry
Dusona		stragifex	(Förster, 1868)	S.Klopfstein	2021			1	1	99	999	Station Linné	dry	7	858	2004.vi.27	2004.vii.01	Sweden	Uppland	Älvkarleby kommun	Båtfors	60.4607	17.3178	Malaise trap	Mixed pine forest with blue berry
Dusona	cf.	stragifex	(Förster, 1868)	N.Meier	2020	hind femur conspicuosly marked with red		1	1	99	999	Station Linné	dry	28	1465	2005.vi.06	2005.vii.05	Sweden	Gotland	Gotlands kommun	Roleks	57.5368	18.3379	Malaise trap	border between mixed pine forest and open grazed calcareous pasture
Dusona		stragifex	(Förster, 1868)	N.Meier	2020			1	1	99	999	Station Linné	dry	28	1466	2005.vii.05	2005.vii.17	Sweden	Gotland	Gotlands kommun	Roleks	57.5368	18.3379	Malaise trap	border between mixed pine forest and open grazed calcareous pasture
Dusona		stragifex	(Förster, 1868)	N.Meier	2020			1	1	99	999	Station Linné	dry	28	1466	2005.vii.05	2005.vii.17	Sweden	Gotland	Gotlands kommun	Roleks	57.5368	18.3379	Malaise trap	border between mixed pine forest and open grazed calcareous pasture
Dusona		stragifex	(Förster, 1868)	N.Meier	2020			1	1	99	999	Station Linné	dry	28	1463	2004.ix.21	2005.iv.01	Sweden	Gotland	Gotlands kommun	Roleks	57.5368	18.3379	Malaise trap	border between mixed pine forest and open grazed calcareous pasture
Dusona		stragifex	(Förster, 1868)	N.Meier	2020			1	1	99	999	Station Linné	dry	1001	1728	2006.v.18	2006.vi.15	Sweden	Småland	Nybro kommun	Bäckebo, Grytsjöns naturreservat, Äng	56.9314	16.0855	Malaise trap	Old moisty haymaking meadow at edge of mixed forest
Dusona		stragifex	(Förster, 1868)	N.Meier	2020			1	1	99	999	Station Linné	dry	1006	1425	2005.vii.15	2005.vii.15	Sweden	Skåne	Ystad kommun	Sandhammaren, Järahusen, skog	55.4038	14.1999	Malaise trap	mixed oak forest on sand dunes
Dusona		stragifex	(Förster, 1868)	N.Meier	2020			1	1	99	999	Station Linné	dry	1008	1742	2006.vii.10	2006.vii.16	Sweden	Småland	Nybro kommun	Alsterbro/Alsterån	56.9365	15.9202	Malaise trap	Mixed forest
Dusona		stragifex	(Förster, 1868)	S.Klopfstein	2021			1	1	99	999	Station Linné	dry	7	1591	2005.vi.14	2005.vii.04	Sweden	Uppland	Älvkarleby kommun	Båtfors	60.4607	17.3178	Malaise trap	Mixed pine forest with blue berry
Dusona		stragifex	(Förster, 1868)	S.Klopfstein	2021		1		1	99	999	Station Linné	dry	7	1591	2005.vi.14	2005.vii.04	Sweden	Uppland	Älvkarleby kommun	Båtfors	60.4607	17.3178	Malaise trap	Mixed pine forest with blue berry
Dusona		stragifex	(Förster, 1868)	S.Klopfstein	2021			1	1	99	999	Station Linné	dry	7	378	2003.vi.17	2003.vii.03	Sweden	Uppland	Älvkarleby kommun	Båtfors	60.4607	17.3178	Malaise trap	Mixed pine forest with blue berry
Dusona		stragifex	(Förster, 1868)	S.Klopfstein	2021			1	1	99	999	Station Linné	dry	7	378	2003.vi.17	2003.vii.03	Sweden	Uppland	Älvkarleby kommun	Båtfors	60.4607	17.3178	Malaise trap	Mixed pine forest with blue berry
Dusona		stragifex	(Förster, 1868)	S.Klopfstein	2021			1	1	99	999	Station Linné	dry	7	378	2003.vi.17	2003.vii.03	Sweden	Uppland	Älvkarleby kommun	Båtfors	60.4607	17.3178	Malaise trap	Mixed pine forest with blue berry
Dusona		stragifex	(Förster, 1868)	S.Klopfstein	2021			1	1	99	999	Station Linné	dry	7	378	2003.vi.17	2003.vii.03	Sweden	Uppland	Älvkarleby kommun	Båtfors	60.4607	17.3178	Malaise trap	Mixed pine forest with blue berry
Dusona		stragifex	(Förster, 1868)	S.Klopfstein	2021			1	1	99	999	Station Linné	dry	7	378	2003.vi.17	2003.vii.03	Sweden	Uppland	Älvkarleby kommun	Båtfors	60.4607	17.3178	Malaise trap	Mixed pine forest with blue berry
Dusona		stragifex	(Förster, 1868)	S.Klopfstein	2021			1	1	99	999	Station Linné	dry	7	378	2003.vi.17	2003.vii.03	Sweden	Uppland	Älvkarleby kommun	Båtfors	60.4607	17.3178	Malaise trap	Mixed pine forest with blue berry
Dusona		stragifex	(Förster, 1868)	S.Klopfstein	2021			1	1	99	999	Station Linné	dry	7	378	2003.vi.17	2003.vii.03	Sweden	Uppland	Älvkarleby kommun	Båtfors	60.4607	17.3178	Malaise trap	Mixed pine forest with blue berry
Dusona		stragifex	(Förster, 1868)	S.Klopfstein	2021			1	1	99	999	Station Linné	dry	7	378	2003.vi.17	2003.vii.03	Sweden	Uppland	Älvkarleby kommun	Båtfors	60.4607	17.3178	Malaise trap	Mixed pine forest with blue berry
Dusona		stragifex	(Förster, 1868)	S.Klopfstein	2021			1	1	99	999	Station Linné	dry	7	1591	2005.vi.14	2005.vii.04	Sweden	Uppland	Älvkarleby kommun	Båtfors	60.4607	17.3178	Malaise trap	Mixed pine forest with blue berry
Dusona		stragifex	(Förster, 1868)	S.Klopfstein	2021			1	1	99	999	Station Linné	dry	7	1591	2005.vi.14	2005.vii.04	Sweden	Uppland	Älvkarleby kommun	Båtfors	60.4607	17.3178	Malaise trap	Mixed pine forest with blue berry
Dusona		stragifex	(Förster, 1868)	S.Klopfstein	2021			1	1	99	999	Station Linné	dry	7	1591	2005.vi.14	2005.vii.04	Sweden	Uppland	Älvkarleby kommun	Båtfors	60.4607	17.3178	Malaise trap	Mixed pine forest with blue berry
Dusona		stragifex	(Förster, 1868)	S.Klopfstein	2021			1	1	99	999	Station Linné	dry	7	1591	2005.vi.14	2005.vii.04	Sweden	Uppland	Älvkarleby kommun	Båtfors	60.4607	17.3178	Malaise trap	Mixed pine forest with blue berry
Dusona		stragifex	(Förster, 1868)	S.Klopfstein	2021			1	1	99	999	Station Linné	dry	7	378	2003.vi.17	2003.vii.03	Sweden	Uppland	Älvkarleby kommun	Båtfors	60.4607	17.3178	Malaise trap	Mixed pine forest with blue berry
Dusona		stragifex	(Förster, 1868)	S.Klopfstein	2021		1		1	99	999	Station Linné	dry	7	1591	2005.vi.14	2005.vii.04	Sweden	Uppland	Älvkarleby kommun	Båtfors	60.4607	17.3178	Malaise trap	Mixed pine forest with blue berry
Dusona		stragifex	(Förster, 1868)	S.Klopfstein	2021		1		1	99	999	Station Linné	dry	7	1591	2005.vi.14	2005.vii.04	Sweden	Uppland	Älvkarleby kommun	Båtfors	60.4607	17.3178	Malaise trap	Mixed pine forest with blue berry
Dusona		stragifex	(Förster, 1868)	S.Klopfstein	2021		1		1	99	999	Station Linné	dry	7	1591	2005.vi.14	2005.vii.04	Sweden	Uppland	Älvkarleby kommun	Båtfors	60.4607	17.3178	Malaise trap	Mixed pine forest with blue berry
Dusona		stragifex	(Förster, 1868)	S.Klopfstein	2021		1		1	99	999	Station Linné	dry	7	378	2003.vi.17	2003.vii.03	Sweden	Uppland	Älvkarleby kommun	Båtfors	60.4607	17.3178	Malaise trap	Mixed pine forest with blue berry
Dusona		stragifex	(Förster, 1868)	S.Klopfstein	2021		1		1	99	999	Station Linné	dry	7	378	2003.vi.17	2003.vii.03	Sweden	Uppland	Älvkarleby kommun	Båtfors	60.4607	17.3178	Malaise trap	Mixed pine forest with blue berry
Dusona		stragifex	(Förster, 1868)	S.Klopfstein	2021		1		1	99	999	Station Linné	dry	7	378	2003.vi.17	2003.vii.03	Sweden	Uppland	Älvkarleby kommun	Båtfors	60.4607	17.3178	Malaise trap	Mixed pine forest with blue berry
Dusona		stragifex	(Förster, 1868)	S.Klopfstein	2021		1		1	99	999	Station Linné	dry	7	378	2003.vi.17	2003.vii.03	Sweden	Uppland	Älvkarleby kommun	Båtfors	60.4607	17.3178	Malaise trap	Mixed pine forest with blue berry
Dusona		stragifex	(Förster, 1868)	S.Klopfstein	2021		1		1	99	999	Station Linné	dry	7	378	2003.vi.17	2003.vii.03	Sweden	Uppland	Älvkarleby kommun	Båtfors	60.4607	17.3178	Malaise trap	Mixed pine forest with blue berry
Dusona		stragifex	(Förster, 1868)	S.Klopfstein	2021		1		1	99	999	Station Linné	dry	7	378	2003.vi.17	2003.vii.03	Sweden	Uppland	Älvkarleby kommun	Båtfors	60.4607	17.3178	Malaise trap	Mixed pine forest with blue berry
Dusona		stragifex	(Förster, 1868)	S.Klopfstein	2021			1	1	99	999	Station Linné	dry	7	858	2004.vi.27	2004.vii.01	Sweden	Uppland	Älvkarleby kommun	Båtfors	60.4607	17.3178	Malaise trap	Mixed pine forest with blue berry
Dusona		stragifex	(Förster, 1868)	S.Klopfstein	2021			1	1	99	999	Station Linné	dry	7	858	2004.vi.27	2004.vii.01	Sweden	Uppland	Älvkarleby kommun	Båtfors	60.4607	17.3178	Malaise trap	Mixed pine forest with blue berry
Dusona		stragifex	(Förster, 1868)	S.Klopfstein	2021		1		1	99	999	Station Linné	dry	7	380	2003.vii.29	2003.viii.12	Sweden	Uppland	Älvkarleby kommun	Båtfors	60.4607	17.3178	Malaise trap	Mixed pine forest with blue berry
Dusona		stragifex	(Förster, 1868)	S.Klopfstein	2021			1	1	99	999	Station Linné	dry	7	380	2003.vii.29	2003.viii.12	Sweden	Uppland	Älvkarleby kommun	Båtfors	60.4607	17.3178	Malaise trap	Mixed pine forest with blue berry
Dusona		stragifex	(Förster, 1868)	S.Klopfstein	2021			1	1	99	999	Station Linné	dry	7	380	2003.vii.29	2003.viii.12	Sweden	Uppland	Älvkarleby kommun	Båtfors	60.4607	17.3178	Malaise trap	Mixed pine forest with blue berry
Dusona		stragifex	(Förster, 1868)	S.Klopfstein	2021			1	1	99	999	Station Linné	dry	7	380	2003.vii.29	2003.viii.12	Sweden	Uppland	Älvkarleby kommun	Båtfors	60.4607	17.3178	Malaise trap	Mixed pine forest with blue berry
Dusona		stragifex	(Förster, 1868)	S.Klopfstein	2021			1	1	99	999	Station Linné	dry	7	380	2003.vii.29	2003.viii.12	Sweden	Uppland	Älvkarleby kommun	Båtfors	60.4607	17.3178	Malaise trap	Mixed pine forest with blue berry
Dusona		stragifex	(Förster, 1868)	S.Klopfstein	2021			1	1	99	999	Station Linné	dry	7	380	2003.vii.29	2003.viii.12	Sweden	Uppland	Älvkarleby kommun	Båtfors	60.4607	17.3178	Malaise trap	Mixed pine forest with blue berry
Dusona		stragifex	(Förster, 1868)	S.Klopfstein	2021			1	1	99	999	Station Linné	dry	7	380	2003.vii.29	2003.viii.12	Sweden	Uppland	Älvkarleby kommun	Båtfors	60.4607	17.3178	Malaise trap	Mixed pine forest with blue berry
Dusona		stragifex	(Förster, 1868)	S.Klopfstein	2021			1	1	99	999	Station Linné	dry	7	380	2003.vii.29	2003.viii.12	Sweden	Uppland	Älvkarleby kommun	Båtfors	60.4607	17.3178	Malaise trap	Mixed pine forest with blue berry
Dusona		stragifex	(Förster, 1868)	S.Klopfstein	2021			1	1	99	999	Station Linné	dry	7	380	2003.vii.29	2003.viii.12	Sweden	Uppland	Älvkarleby kommun	Båtfors	60.4607	17.3178	Malaise trap	Mixed pine forest with blue berry
Dusona		stragifex	(Förster, 1868)	S.Klopfstein	2021			1	1	99	999	Station Linné	dry	7	380	2003.vii.29	2003.viii.12	Sweden	Uppland	Älvkarleby kommun	Båtfors	60.4607	17.3178	Malaise trap	Mixed pine forest with blue berry
Dusona		subimpressa	(Förster, 1868)	N.Meier	2020		1		1	99	999	Station Linné	dry	37	1822	2005.vii.07	2005.viii.09	Sweden	Skåne	Klippans kommun	Skäralid, dal	56.0272	13.2234	Malaise trap	rich beech forest
Dusona		subimpressa	(Förster, 1868)	N.Meier	2020		1		1	99	999	Station Linné	dry	37	1822	2005.vii.07	2005.viii.09	Sweden	Skåne	Klippans kommun	Skäralid, dal	56.0272	13.2234	Malaise trap	rich beech forest
Dusona		subimpressa	(Förster, 1868)	N.Meier	2020			1	1	99	999	Station Linné	dry	38	1443	2005.v.24	2005.v.31	Sweden	Skåne	Tomelilla kommun	Drakamöllan	55.7618	14.1178	Malaise trap	common bent heath on sandy area
Dusona		subimpressa	(Förster, 1868)	N.Meier	2020			1	1	99	999	Station Linné	dry	38	1446	2005.vi.13	2005.vi.20	Sweden	Skåne	Tomelilla kommun	Drakamöllan	55.7618	14.1178	Malaise trap	common bent heath on sandy area
Dusona		subimpressa	(Förster, 1868)	N.Meier	2020		1		1	99	999	Station Linné	dry	39	1799	2005.ii.17	2005.iv.22	Sweden	Skåne	Simrishamns kommun	Stenshuvuds nationalpark, Krivarboden	55.6603	14.2755	Malaise trap	litter rich broad-leaved deciduous forest
Dusona		subimpressa	(Förster, 1868)	N.Meier	2020		1		1	99	999	Station Linné	dry	39	1806	2005.vii.21	2005.viii.08	Sweden	Skåne	Simrishamns kommun	Stenshuvuds nationalpark, Krivarboden	55.6603	14.2755	Malaise trap	litter rich broad-leaved deciduous forest
Dusona		subimpressa	(Förster, 1868)	N.Meier	2020		1		1	99	999	Station Linné	dry	39	1799	2005.ii.17	2005.iv.22	Sweden	Skåne	Simrishamns kommun	Stenshuvuds nationalpark, Krivarboden	55.6603	14.2755	Malaise trap	litter rich broad-leaved deciduous forest
Dusona		subimpressa	(Förster, 1868)	N.Meier	2020		1		1	99	999	Station Linné	dry	39	1799	2005.ii.17	2005.iv.22	Sweden	Skåne	Simrishamns kommun	Stenshuvuds nationalpark, Krivarboden	55.6603	14.2755	Malaise trap	litter rich broad-leaved deciduous forest
Dusona		subimpressa	(Förster, 1868)	N.Meier	2020		1		1	99	999	Station Linné	dry	1000	1323	2005.vii.02	2005.vii.12	Sweden	Småland	Nybro kommun	Bäckebo, Grytsjöns naturreservat, Aspskog	56.9217	16.1012	Malaise trap	old aspen in boulder terrain
Dusona		subimpressa	(Förster, 1868)	N.Meier	2020			1	1	99	999	Station Linné	dry	1001	1728	2006.v.18	2006.vi.15	Sweden	Småland	Nybro kommun	Bäckebo, Grytsjöns naturreservat, Äng	56.9314	16.0855	Malaise trap	Old moisty haymaking meadow at edge of mixed forest
Dusona		subimpressa	(Förster, 1868)	N.Meier	2020		1		1	99	999	Station Linné	dry	1001	1329	2005.vi.04	2005.vi.19	Sweden	Småland	Nybro kommun	Bäckebo, Grytsjöns naturreservat, Äng	56.9314	16.0855	Malaise trap	Old moisty haymaking meadow at edge of mixed forest
Dusona		subimpressa	(Förster, 1868)	N.Meier	2020		1		1	99	999	Station Linné	dry	1001	1728	2006.v.18	2006.vi.15	Sweden	Småland	Nybro kommun	Bäckebo, Grytsjöns naturreservat, Äng	56.9314	16.0855	Malaise trap	Old moisty haymaking meadow at edge of mixed forest
Dusona		subimpressa	(Förster, 1868)	N.Meier	2020		1		1	99	999	Station Linné	dry	1001	1728	2006.v.18	2006.vi.15	Sweden	Småland	Nybro kommun	Bäckebo, Grytsjöns naturreservat, Äng	56.9314	16.0855	Malaise trap	Old moisty haymaking meadow at edge of mixed forest
Dusona		subimpressa	(Förster, 1868)	N.Meier	2020			1	1	99	999	Station Linné	dry	1006	1425	2005.vii.15	2005.vii.15	Sweden	Skåne	Ystad kommun	Sandhammaren, Järahusen, skog	55.4038	14.1999	Malaise trap	mixed oak forest on sand dunes
Dusona		subimpressa	(Förster, 1868)	N.Meier	2020			1	1	99	999	Station Linné	dry	1006	1425	2005.vii.15	2005.vii.15	Sweden	Skåne	Ystad kommun	Sandhammaren, Järahusen, skog	55.4038	14.1999	Malaise trap	mixed oak forest on sand dunes
Dusona		subimpressa	(Förster, 1868)	N.Meier	2020		1		1	99	999	Station Linné	dry	1008	1737	2006.vi.10	2006.vi.16	Sweden	Småland	Nybro kommun	Alsterbro/Alsterån	56.9365	15.9202	Malaise trap	Mixed forest
Dusona		tenuis	(Förster, 1868)	N.Meier	2020			1	1	99	999	Station Linné	dry	22	1363	2005.viii.01	2005.viii.19	Sweden	Öland	Mörbylånga kommun	Gamla Skogsby (Kalkstad)	56.6167	16.5076	Malaise trap	meadow with shrub vegetation
Dusona		tenuis	(Förster, 1868)	N.Meier	2020		1		1	99	999	Station Linné	dry	22	1364	2005.viii.19	2005.ix.12	Sweden	Öland	Mörbylånga kommun	Gamla Skogsby (Kalkstad)	56.6167	16.5076	Malaise trap	meadow with shrub vegetation
Dusona		tenuis	(Förster, 1868)	N.Meier	2020		1		1	99	999	Station Linné	dry	28	1466	2005.vii.05	2005.vii.17	Sweden	Gotland	Gotlands kommun	Roleks	57.5368	18.3379	Malaise trap	border between mixed pine forest and open grazed calcareous pasture
Dusona		tenuis	(Förster, 1868)	N.Meier	2020		1		1	99	999	Station Linné	dry	28	1469	2005.ix.02	2005.xi.08	Sweden	Gotland	Gotlands kommun	Roleks	57.5368	18.3379	Malaise trap	border between mixed pine forest and open grazed calcareous pasture
Dusona		tenuis	(Förster, 1868)	N.Meier	2020		1		1	99	999	Station Linné	dry	28	1466	2005.vii.05	2005.vii.17	Sweden	Gotland	Gotlands kommun	Roleks	57.5368	18.3379	Malaise trap	border between mixed pine forest and open grazed calcareous pasture
Dusona		tenuis	(Förster, 1868)	N.Meier	2020		1		1	99	999	Station Linné	dry	28	1466	2005.vii.05	2005.vii.17	Sweden	Gotland	Gotlands kommun	Roleks	57.5368	18.3379	Malaise trap	border between mixed pine forest and open grazed calcareous pasture
Dusona		tenuis	(Förster, 1868)	N.Meier	2020			1	1	99	999	Station Linné	dry	28	1469	2005.ix.02	2005.xi.08	Sweden	Gotland	Gotlands kommun	Roleks	57.5368	18.3379	Malaise trap	border between mixed pine forest and open grazed calcareous pasture
Dusona		tenuis	(Förster, 1868)	N.Meier	2020		1		1	99	999	Station Linné	dry	28	1466	2005.vii.05	2005.vii.17	Sweden	Gotland	Gotlands kommun	Roleks	57.5368	18.3379	Malaise trap	border between mixed pine forest and open grazed calcareous pasture
Dusona		tenuis	(Förster, 1868)	N.Meier	2020		1		1	99	999	Station Linné	dry	28	1468	2005.viii.09	2005.ix.02	Sweden	Gotland	Gotlands kommun	Roleks	57.5368	18.3379	Malaise trap	border between mixed pine forest and open grazed calcareous pasture
Dusona		tenuis	(Förster, 1868)	N.Meier	2020			1	1	99	999	Station Linné	dry	2046	2055	2008.vii.16	2008.viii.01	Sweden	Småland	Torsås Kommun	Söderåkra, Påboda	56.4347	16.0708	Malaise trap	Garden
Dusona		terebrator	(Förster, 1868)	N.Meier	2020		1		1	99	999	Station Linné	dry	32	1530	2005-vi.30	2005.vii.16	Sweden	Bohuslän	Tanums kommun	Hamburgsund, Stora Snixholmen	58.5644	11.2517	Malaise trap	semi-exposed coastal flat-rock
Dusona		terebrator	(Förster, 1868)	N.Meier	2020			1	1	99	999	Station Linné	dry	1004	1798	2005.vii.30	2005.viii.09	Sweden	Skåne	Höganäs kommun	Kullabergs naturreservat, between Hjortstugan and Ransvik	56.2916	12.4825	Malaise trap	Oak forest in southern slope
Dusona		terebrator	(Förster, 1868)	N.Meier	2020			1	1	99	999	Station Linné	dry	2046	2056	2008.viii.01	2008.viii.16	Sweden	Småland	Torsås Kommun	Söderåkra, Påboda	56.4347	16.0708	Malaise trap	Garden
Dusona		terebrator	(Förster, 1868)	N.Meier	2020			1	1	99	999	Station Linné	dry	2046	2056	2008.viii.01	2008.viii.16	Sweden	Småland	Torsås Kommun	Söderåkra, Påboda	56.4347	16.0708	Malaise trap	Garden
Dusona		vidua	(Gravenhorst, 1829)	S.Klopfstein	2021			1	1	99	999	Station Linné	dry	35	1792	2005.viii.04	2005.viii.15	Sweden	Halland	Halmstad kommun	Gårdshult, Buskastycket	56.6949	13.1505	Malaise trap	moist hay meadow
Dusona		xenocampta	(Förster, 1868)	N.Meier	2020			1	1	99	999	Station Linné	dry	7	1592	2005.vii.04	2005.vii.17	Sweden	Uppland	Älvkarleby kommun	Båtfors	60.4607	17.3178	Malaise trap	Mixed pine forest with blue berry
Dusona		xenocampta	(Förster, 1868)	N.Meier	2020			1	1	99	999	Station Linné	dry	7	1592	2005.vii.04	2005.vii.17	Sweden	Uppland	Älvkarleby kommun	Båtfors	60.4607	17.3178	Malaise trap	Mixed pine forest with blue berry
Dusona		xenocampta	(Förster, 1868)	N.Meier	2020			1	1	99	999	Station Linné	dry	7	1592	2005.vii.04	2005.vii.17	Sweden	Uppland	Älvkarleby kommun	Båtfors	60.4607	17.3178	Malaise trap	Mixed pine forest with blue berry
Dusona		xenocampta	(Förster, 1868)	N.Meier	2020			1	1	99	999	Station Linné	dry	28	1466	2005.vii.05	2005.vii.17	Sweden	Gotland	Gotlands kommun	Roleks	57.5368	18.3379	Malaise trap	border between mixed pine forest and open grazed calcareous pasture
Dusona		xenocampta	(Förster, 1868)	N.Meier	2020			1	1	99	999	Station Linné	dry	28	1466	2005.vii.05	2005.vii.17	Sweden	Gotland	Gotlands kommun	Roleks	57.5368	18.3379	Malaise trap	border between mixed pine forest and open grazed calcareous pasture
Dusona		xenocampta	(Förster, 1868)	N.Meier	2020			1	1	99	999	Station Linné	dry	28	1466	2005.vii.05	2005.vii.17	Sweden	Gotland	Gotlands kommun	Roleks	57.5368	18.3379	Malaise trap	border between mixed pine forest and open grazed calcareous pasture
Dusona		xenocampta	(Förster, 1868)	N.Meier	2020			1	1	99	999	Station Linné	dry	28	1466	2005.vii.05	2005.vii.17	Sweden	Gotland	Gotlands kommun	Roleks	57.5368	18.3379	Malaise trap	border between mixed pine forest and open grazed calcareous pasture
Dusona		xenocampta	(Förster, 1868)	N.Meier	2020			1	1	99	999	Station Linné	dry	28	1466	2005.vii.05	2005.vii.17	Sweden	Gotland	Gotlands kommun	Roleks	57.5368	18.3379	Malaise trap	border between mixed pine forest and open grazed calcareous pasture
Dusona		xenocampta	(Förster, 1868)	N.Meier	2020			1	1	99	999	Station Linné	dry	28	1466	2005.vii.05	2005.vii.17	Sweden	Gotland	Gotlands kommun	Roleks	57.5368	18.3379	Malaise trap	border between mixed pine forest and open grazed calcareous pasture
Dusona		xenocampta	(Förster, 1868)	N.Meier	2020			1	1	99	999	Station Linné	dry	28	1465	2005.vi.06	2005.vii.05	Sweden	Gotland	Gotlands kommun	Roleks	57.5368	18.3379	Malaise trap	border between mixed pine forest and open grazed calcareous pasture
Dusona		xenocampta	(Förster, 1868)	N.Meier	2020			1	1	99	999	Station Linné	dry	1000	1323	2005.vii.02	2005.vii.12	Sweden	Småland	Nybro kommun	Bäckebo, Grytsjöns naturreservat, Aspskog	56.9217	16.1012	Malaise trap	old aspen in boulder terrain
Dusona		xenocampta	(Förster, 1868)	N.Meier	2020		1		1	99	999	Station Linné	dry	2003	2033	2006.vi.09	2006.vi.29	Sweden	Södermanland	Huddinge kommun	Sofielunds återvinningsanläggning, kadaverdeponi	59.1765	17.9938	Malaise trap	garbage dump – cadaver landfill
Dusona		xenocampta	(Förster, 1868)	N.Meier	2021			1	1	99	999	Station Linné	dry	7	1591	2005.vi.14	2005.vii.04	Sweden	Uppland	Älvkarleby kommun	Båtfors	60.4607	17.3178	Malaise trap	Mixed pine forest with blue berry
Dusona		xenocampta	(Förster, 1868)	N.Meier	2021		1		1	99	999	Station Linné	dry	7	1591	2005.vi.14	2005.vii.04	Sweden	Uppland	Älvkarleby kommun	Båtfors	60.4607	17.3178	Malaise trap	Mixed pine forest with blue berry
Dusona		xenocampta	(Förster, 1868)	N.Meier	2021			1	1	99	999	Station Linné	dry	7	378	2003.vi.17	2003.vii.03	Sweden	Uppland	Älvkarleby kommun	Båtfors	60.4607	17.3178	Malaise trap	Mixed pine forest with blue berry
Dusona		xenocampta	(Förster, 1868)	N.Meier	2021		1		1	99	999	Station Linné	dry	7	1591	2005.vi.14	2005.vii.04	Sweden	Uppland	Älvkarleby kommun	Båtfors	60.4607	17.3178	Malaise trap	Mixed pine forest with blue berry
Dusona		xenocampta	(Förster, 1868)	N.Meier	2021		1		1	99	999	Station Linné	dry	7	1591	2005.vi.14	2005.vii.04	Sweden	Uppland	Älvkarleby kommun	Båtfors	60.4607	17.3178	Malaise trap	Mixed pine forest with blue berry
Dusona		xenocampta	(Förster, 1868)	S.Klopfstein	2021			1	1	99	999	Station Linné	dry	7	380	2003.vii.29	2003.viii.12	Sweden	Uppland	Älvkarleby kommun	Båtfors	60.4607	17.3178	Malaise trap	Mixed pine forest with blue berry
